# Supplementary material for: Introduction of prenyl fragment into chalcones through α-regioselective 1,2-addition in THF
Source: Royal Society of Chemistry journal article supplement (doi:10.1039/c4ra03301a), 2014-01-01
Supplement: c4ra03301a1.pdf [file c4ra03301a1.pdf]

# Supporting Information

## Introduction of Prenyl Fragment into Chalcones through $\alpha$ - Regioselective 1,2-Addition in THF

Hai-Shan Jin, Shu-Qing Zhang, Rui Sun, Fei Dou, and Li-Ming Zhao\*

*School of Chemistry and Chemical Engineering, and Jiangsu Key Laboratory of Green Synthetic Chemistry for Functional Materials, Jiangsu Normal University, Xuzhou 221116, Jiangsu, China*

[lmzhao@jsnu.edu.cn](mailto:lmzhao@jsnu.edu.cn)

## Table of Contents

|                                                                                                            |         |
|------------------------------------------------------------------------------------------------------------|---------|
| 1. General Methods.....                                                                                    | S2      |
| 2. General Procedure for the Synthesis of <b>2a-r</b> .....                                                | S2      |
| 3. General Procedure for the Synthesis of <b>2s</b> and <b>2t</b> .....                                    | S2      |
| 4. General Procedure for the Synthesis of <b>3a, 3h, 3j, 3l, and 3w</b> .....                              | S3      |
| 5. Characterization of <b>2a-v</b> .....                                                                   | S3-S11  |
| 6. Characterization of <b>3a, 3h, 3j, 3l, and 3w</b> .....                                                 | S11-S14 |
| 7. Copies of $^1\text{H}$ and $^{13}\text{C}$ NMR Spectra for Compounds <b>2a-v</b> .....                  | S15-S36 |
| 8. Copy of $^1\text{H}$ NMR Spectrum of $\gamma$ -Adduct from 4-Phenylbut-3-en-2-one <b>1s</b> .....       | S37     |
| 9. Copies of $^1\text{H}$ and $^{13}\text{C}$ NMR Spectra for Compounds <b>3a, 3h, 3j, 3l, and 3w</b> .... | S38-S42 |
| 10. Copies of $^1\text{H}$ and $^{13}\text{C}$ NMR Spectra for Compounds <b>4</b> .....                    | S43     |

## 1 General Methods

$\alpha,\beta$ -unsaturated carbonyl compounds were prepared by condensation reactions of respective aldehydes and ketones. Solvents were treated prior to use according to the standard methods. Other reagents were used as purchased without further purification.

$^1\text{H}$  NMR and  $^{13}\text{C}$  NMR spectra were recorded at 400 MHz and 100 MHz in  $\text{CDCl}_3$  with chemical shift ( $\delta$ ) given in ppm relative to TMS as internal standard. Multiplicities are indicated, s (singlet), d (doublet), t (triplet), q (quartet), m (multiplet); coupling constant ( $J$ ) are in Hertz (Hz). High resolution mass spectra (HRMS) were recorded using a TOF instrument using electrospray ionization (ESI).

## 2 General Procedure for the Synthesis of 2a-r

Prenyl bromide (2.0 mmol) was added into a suspension of activated zinc powder (2.5 mmol) in dry THF (10 ml); the reaction mixture was stirred for 1 h at room temperature. Filtered the solution through a Schlenk filter and kept under  $\text{N}_2$  for the following reaction. A solution of chalcones **1** (1.0 mmol) in dry THF (5 ml) was added the solution of prenylzinc bromide prepared above. The mixture was refluxed for 10 h. The residue was purified by flash column chromatography (petroleum ether/ethyl acetate, 40/1, v/v) to afford the  $\alpha$ -adducts **2a-r**.

## 3 General Procedure for the Synthesis of 2s and 2t

Prenyl bromide (2.0 mmol) was added into a suspension of activated zinc powder (2.5 mmol) in dry THF (10 ml); the reaction mixture was stirred for 1 h at room temperature. Filtered the solution through a Schlenk filter and kept under  $\text{N}_2$  for the following reaction. A solution of  $\alpha,\beta$ -unsaturated carbonyl compounds **1** (1.0 mmol) in dry THF (5 ml) was added the solution of prenylzinc bromide prepared above. The solution was stirred for 1 h at room temperature. Then DMI (1.5 ml) was added into the reaction mixture, followed by removal of initial reaction solvent (THF). The mixture was heated to 120 °C for 14 h. The residue was purified by flash column chromatography (petroleum ether/ethyl acetate, 40/1, v/v) to afford the  $\alpha$ -adducts **2s** and **2t**.

#### 4 General Procedure for the Synthesis of 3a, 3h, 3j, 3l, and 3w

Crotyl bromide (2.0 mmol) was added into a suspension of activated zinc powder (2.5 mmol) in dry THF (10 ml); the reaction mixture was stirred for 1 h at room temperature. Filtered the solution through a Schlenk filter and kept under N<sub>2</sub> for the following reaction. A solution of chalcones **1** (1.0 mmol) in dry THF (5 ml) was added the solution of crotylzinc bromide prepared above. The mixture was refluxed for 10 h. The residue was purified by flash column chromatography (petroleum ether/ethyl acetate, 40/1, v/v) to afford the  $\alpha$ -adducts **3a**, **3h**, **3j**, **3l**, and **3w**.

#### 5 Characterization of 2a-r

Characterization of **2a**:

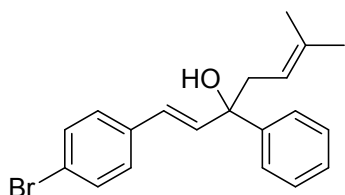

Colorless oil; <sup>1</sup>H NMR (CDCl<sub>3</sub>, 400 MHz)  $\delta$ : 7.50 (d,  $J$  = 8.0 Hz, 2H), 7.41 (d,  $J$  = 8.4 Hz, 2H), 7.36 (t,  $J$  = 8.0 Hz, 2H), 7.27-7.22 (m, 3H), 6.58 (d,  $J$  = 16.0 Hz, 1H), 6.50 (d,  $J$  = 16.0 Hz, 1H), 5.07 (t,  $J$  = 7.6 Hz, 1H), 2.80-2.70 (m, 2H), 2.30 (s, 1H), 1.71 (s, 3H), 1.66 (s, 3H). <sup>13</sup>C NMR (CDCl<sub>3</sub>, 100 MHz)  $\delta$ : 145.5, 137.7, 136.4, 135.9, 131.6, 128.3, 128.1, 126.9, 125.4, 121.1, 117.9, 76.4, 41.2, 26.1, 18.2. HRMS (ESI):  $m/z$  calcd for C<sub>20</sub>H<sub>21</sub>OBrNa [M + Na]<sup>+</sup>: 379.0673; Found: 379.0673.

Characterization of **2b**:

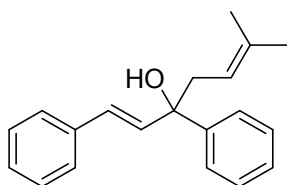

Yellow oil; <sup>1</sup>H NMR (CDCl<sub>3</sub>, 400 MHz)  $\delta$ : 7.52 (d,  $J$  = 8.0 Hz, 2H), 7.42-7.18 (m, 8H), 6.64 (d,  $J$  = 16.0 Hz, 1H), 6.53 (d,  $J$  = 16.0 Hz, 1H), 5.09 (t,  $J$  = 7.8 Hz, 1H), 2.83-2.67 (m, 2H), 2.28 (s, 1H), 1.71 (s, 3H), 1.66 (s, 3H). <sup>13</sup>C NMR (CDCl<sub>3</sub>, 100 MHz)  $\delta$ : 145.8, 137.6, 136.9,

135.6, 128.6, 128.3, 128.1, 127.5, 126.9, 126.6, 125.3, 118.1, 76.4, 41.3, 26.1, 18.2. HRMS (ESI):  $m/z$  calcd for  $C_{20}H_{22}ONa$   $[M + Na]^+$ : 301.1568; Found: 301.1568.

Characterization of **2c**:

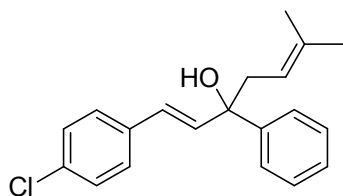

Yellow oil;  $^1H$  NMR ( $CDCl_3$ , 400 MHz)  $\delta$ : 7.51 (d,  $J = 8.0$  Hz, 2H), 7.37 (t,  $J = 7.8$  Hz, 2H), 7.33-7.23 (m, 5H), 6.60 (d,  $J = 16.0$  Hz, 1H), 6.49 (d,  $J = 16.0$  Hz, 1H), 5.07 (t,  $J = 7.0$  Hz, 1H), 2.83-2.65 (m, 2H), 2.28 (s, 1H), 1.71 (s, 3H), 1.66 (s, 3H).  $^{13}C$  NMR ( $CDCl_3$ , 100 MHz)  $\delta$ : 145.5, 137.8, 136.3, 135.5, 133.0, 128.7, 128.3, 127.8, 126.9, 126.8, 125.5, 117.9, 76.4, 41.2, 26.1, 18.2. HRMS (ESI):  $m/z$  calcd for  $C_{20}H_{21}ClONa$   $[M + Na]^+$ : 335.1179; Found: 335.1179.

Characterization of **2d**:

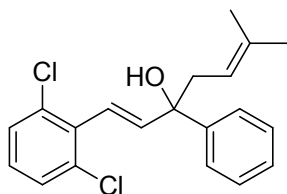

Colorless oil;  $^1H$  NMR ( $CDCl_3$ , 400 MHz)  $\delta$ : 7.58 (d,  $J = 7.6$  Hz, 2H), 7.38 (t,  $J = 7.6$  Hz, 2H), 7.33-7.23 (m, 3H), 7.08 (t,  $J = 8.0$  Hz, 1H), 6.67 (d,  $J = 16.4$  Hz, 1H), 6.52 (d,  $J = 16.4$  Hz, 1H), 5.23 (t,  $J = 7.2$  Hz, 1H), 2.84-2.67 (m, 2H), 2.35 (s, 1H), 1.74 (s, 3H), 1.67 (s, 3H).  $^{13}C$  NMR ( $CDCl_3$ , 100 MHz)  $\delta$ : 145.2, 143.5, 137.5, 134.8, 134.5, 128.3, 128.0, 127.0, 125.7, 122.4, 118.2, 76.6, 41.0, 26.2, 18.2. HRMS (ESI):  $m/z$  calcd for  $C_{20}H_{20}Cl_2ONa$   $[M + Na]^+$ : 369.0789; Found: 369.0806.

Characterization of **2e**:

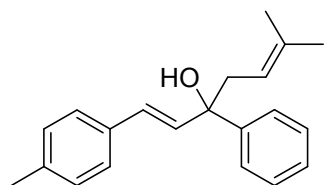

Pale yellow oil;  $^1\text{H NMR}$  ( $\text{CDCl}_3$ , 400 MHz)  $\delta$ : 7.52 (d,  $J = 8.4$  Hz, 2H), 7.35 (t,  $J = 8.0$  Hz, 2H), 7.31-7.21 (m, 3H), 7.11 (d,  $J = 8.0$  Hz, 2H), 6.60 (d,  $J = 16.0$  Hz, 1H), 6.47 (d,  $J = 16.0$  Hz, 1H), 5.09 (t,  $J = 8.0$  Hz, 1H), 2.90-2.58 (m, 2H), 2.32 (s, 3H), 2.26 (s, 1H), 1.71 (s, 3H), 1.66 (s, 3H).  $^{13}\text{C NMR}$  ( $\text{CDCl}_3$ , 100 MHz)  $\delta$ : 145.9, 137.4, 137.3, 134.6, 134.1, 129.3, 128.2, 128.0, 126.8, 126.5, 125.6, 118.2, 76.7, 41.3, 26.1, 21.2, 18.3. HRMS (ESI):  $m/z$  calcd for  $\text{C}_{21}\text{H}_{24}\text{ONa}$  [ $\text{M} + \text{Na}$ ] $^+$ : 315.1725; Found: 315.1727.

Characterization of **2f**:

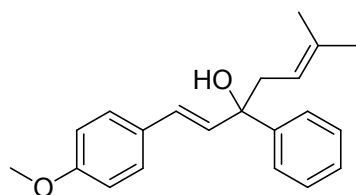

Colorless oil;  $^1\text{H NMR}$  ( $\text{CDCl}_3$ , 400 MHz)  $\delta$ : 7.52 (d,  $J = 7.6$  Hz, 2H), 7.40-7.28 (m, 4H), 7.28-7.20 (m, 1H), 6.82 (d,  $J = 8.0$  Hz, 2H), 6.57 (d,  $J = 16.0$  Hz, 1H), 6.39 (d,  $J = 16.0$  Hz, 1H), 5.09 (t,  $J = 8.0$  Hz, 1H), 3.80 (s, 3H), 2.87-2.63 (m, 2H), 2.26 (s, 1H), 1.71 (s, 3H), 1.66 (s, 3H).  $^{13}\text{C NMR}$  ( $\text{CDCl}_3$ , 100 MHz)  $\delta$ : 159.1, 146.0, 137.3, 133.5, 129.7, 128.2, 127.7, 127.6, 126.8, 125.6, 118.2, 114.0, 76.5, 55.3, 41.4, 26.1, 18.3. HRMS (ESI):  $m/z$  calcd for  $\text{C}_{21}\text{H}_{24}\text{O}_2\text{Na}$  [ $\text{M} + \text{Na}$ ] $^+$ : 331.1674; Found: 331.1665.

Characterization of **2g**:

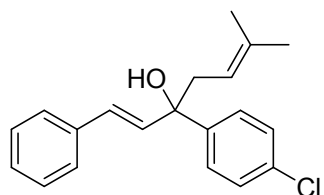

Pale yellow oil;  $^1\text{H NMR}$  ( $\text{CDCl}_3$ , 400 MHz)  $\delta$ : 7.45 (d,  $J = 8.8$  Hz, 2H), 7.38 (d,  $J = 7.2$  Hz, 2H), 7.35-7.20 (m, 5H), 6.62 (d,  $J = 16.0$  Hz, 1H), 6.48 (d,  $J = 16.0$  Hz, 1H), 5.06 (t,  $J = 8.0$

Hz, 1H), 2.80-2.61 (m, 2H), 2.28 (s, 1H), 1.71 (s, 3H), 1.66 (s, 3H).  $^{13}\text{C}$  NMR ( $\text{CDCl}_3$ , 100 MHz)  $\delta$ : 144.3, 138.0, 136.7, 135.0, 132.7, 128.6, 128.5, 128.3, 127.7, 127.1, 126.6, 117.7, 76.1, 41.2, 26.2, 18.3. HRMS (ESI):  $m/z$  calcd for  $\text{C}_{20}\text{H}_{21}\text{ClONa}$   $[\text{M} + \text{Na}]^+$ : 335.1179; Found: 335.1168.

Characterization of **2h**:

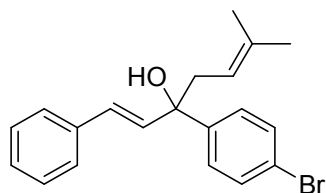

Pale yellow oil;  $^1\text{H}$  NMR ( $\text{CDCl}_3$ , 400 MHz)  $\delta$ : 7.40 (d,  $J = 8.0$  Hz, 2H), 7.33-7.25 (m, 4H), 7.23 (t,  $J = 7.6$  Hz, 2H), 7.16 (t,  $J = 7.6$  Hz, 1H), 6.54 (d,  $J = 16.0$  Hz, 1H), 6.39 (d,  $J = 16.0$  Hz, 1H), 4.98 (t,  $J = 7.2$  Hz, 1H), 2.65-2.63 (m, 2H), 2.21 (s, 1H), 1.64 (s, 3H), 1.58 (s, 3H).  $^{13}\text{C}$  NMR ( $\text{CDCl}_3$ , 100 MHz)  $\delta$ : 144.8, 138.1, 136.6, 135.0, 131.3, 128.6, 128.5, 127.7, 127.5, 126.6, 120.8, 117.6, 76.2, 41.2, 26.2, 18.3. HRMS (ESI):  $m/z$  calcd for  $\text{C}_{20}\text{H}_{21}\text{BrONa}$   $[\text{M} + \text{Na}]^+$ : 379.0673; Found: 379.0659.

Characterization of **2i**:

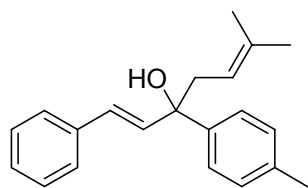

Pale yellow oil;  $^1\text{H}$  NMR ( $\text{CDCl}_3$ , 400 MHz)  $\delta$ : 7.41 (d,  $J = 8.0$  Hz, 2H), 7.38 (d,  $J = 8.0$  Hz, 2H), 7.30 (t,  $J = 7.6$  Hz, 2H), 7.24-7.16 (m, 3H), 6.64 (d,  $J = 16.0$  Hz, 1H), 6.52 (d,  $J = 16.0$  Hz, 1H), 5.11 (t,  $J = 7.2$  Hz, 1H), 2.80-2.69 (m, 2H), 2.35 (s, 3H), 2.25 (s, 1H), 1.72 (s, 3H), 1.67 (s, 3H).  $^{13}\text{C}$  NMR ( $\text{CDCl}_3$ , 100 MHz)  $\delta$ : 142.8, 137.3, 137.0, 136.5, 135.8, 129.0, 128.5, 127.9, 127.4, 126.6, 125.5, 118.3, 76.4, 41.2, 26.1, 21.0, 18.2. HRMS (ESI):  $m/z$  calcd for  $\text{C}_{21}\text{H}_{24}\text{ONa}$   $[\text{M} + \text{Na}]^+$ : 315.1725; Found: 315.1724.

Characterization of **2j**:

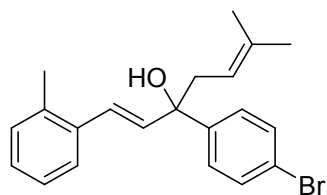

Yellow oil;  $^1\text{H}$  NMR ( $\text{CDCl}_3$ , 400 MHz)  $\delta$ : 7.48 (d,  $J = 8.0$  Hz, 2H), 7.40 (d,  $J = 8.0$  Hz, 2H), 7.17-7.15 (m, 3H), 6.85 (d,  $J = 16.0$  Hz, 1H), 6.35 (d,  $J = 16.0$  Hz), 5.09 (t,  $J = 7.2$  Hz, 1H), 2.76-2.66 (m, 2H), 2.33 (s, 3H), 2.29 (s, 1H), 1.73 (s, 3H), 1.66 (s, 3H).  $^{13}\text{C}$  NMR ( $\text{CDCl}_3$ , 100 MHz)  $\delta$ : 145.0, 138.8, 137.8, 136.4, 136.0, 135.7, 131.3, 130.3, 127.6, 127.6, 126.5, 126.1, 125.7, 120.8, 117.8, 76.4, 41.3, 26.2, 19.9, 18.3. HRMS (ESI):  $m/z$  calcd for  $\text{C}_{21}\text{H}_{23}\text{BrONa}$  [ $\text{M} + \text{Na}$ ] $^+$ : 393.0830; Found: 393.0824.

Characterization of **2k**:

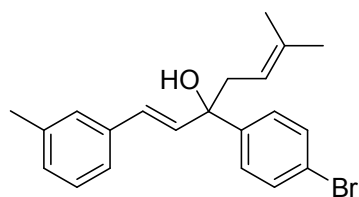

Yellow oil;  $^1\text{H}$  NMR ( $\text{CDCl}_3$ , 400 MHz)  $\delta$ : 7.48 (d,  $J = 8.0$  Hz, 2H), 7.40 (d,  $J = 8.0$  Hz, 2H), 7.23-7.17 (m, 3H), 7.04 (d,  $J = 6.4$  Hz, 1H), 6.59 (d,  $J = 16.0$  Hz, 1H), 6.46 (d,  $J = 16.0$  Hz, 1H), 5.07 (t,  $J = 7.2$  Hz, 1H), 2.76-2.67 (m, 2H), 2.34 (s, 3H), 2.27 (s, 1H), 1.72 (s, 3H), 1.66 (s, 3H).  $^{13}\text{C}$  NMR ( $\text{CDCl}_3$ , 100 MHz)  $\delta$ : 145.0, 138.3, 138.0, 136.8, 135.0, 131.4, 128.8, 128.6, 127.6, 127.4, 123.9, 121.0, 117.9, 76.4, 41.3, 26.3, 21.5, 18.4. HRMS (ESI):  $m/z$  calcd for  $\text{C}_{21}\text{H}_{23}\text{BrONa}$  [ $\text{M} + \text{Na}$ ] $^+$ : 393.0830; Found: 393.0830.

Characterization of **2l**:

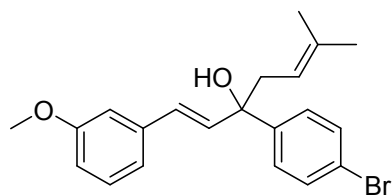

Yellow oil;  $^1\text{H}$  NMR ( $\text{CDCl}_3$ , 400 MHz)  $\delta$ : 7.48 (d,  $J = 8.0$  Hz, 2H), 7.40 (d,  $J = 8.0$  Hz, 2H), 7.25-7.23 (m, 1H), 6.98 (d,  $J = 8.0$  Hz, 1H), 6.92 (s, 1H), 6.80 (d,  $J = 8.0$  Hz, 1H), 6.60 (d,  $J =$

16.0 Hz, 1H), 6.47 (d,  $J = 16.0$  Hz, 1H), 5.07 (t,  $J = 7.2$  Hz, 1H), 3.81 (s, 3H), 2.73-2.71 (m, 2H), 2.34 (s, 1H), 1.72 (s, 3H), 1.66 (s, 3H).  $^{13}\text{C}$  NMR ( $\text{CDCl}_3$ , 100 MHz)  $\delta$ : 160.0, 144.9, 138.3, 138.1, 135.5, 131.4, 129.7, 128.6, 127.6, 121.0, 119.4, 117.8, 113.5, 112.0, 76.3, 55.4, 41.3, 26.2, 18.4. HRMS (ESI):  $m/z$  calcd for  $\text{C}_{21}\text{H}_{23}\text{BrO}_2\text{Na}$   $[\text{M} + \text{Na}]^+$ : 409.0779; Found: 409.0780.

Characterization of **2m**:

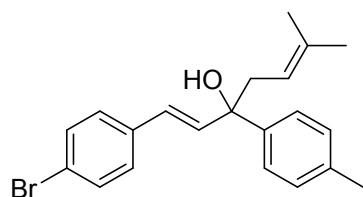

Yellow oil;  $^1\text{H}$  NMR ( $\text{CDCl}_3$ , 400 MHz)  $\delta$ : 7.48 (d,  $J = 8.0$  Hz, 2H), 7.40 (d,  $J = 8.0$  Hz, 2H), 7.23-7.17 (m, 3H), 7.04 (d,  $J = 6.4$  Hz, 1H), 6.59 (d,  $J = 16.0$  Hz, 1H), 6.46 (d,  $J = 16.0$  Hz, 1H), 5.07 (t,  $J = 7.2$  Hz, 1H), 2.76-2.67 (m, 2H), 2.34 (s, 3H), 2.27 (s, 1H), 1.72 (s, 3H), 1.66 (s, 3H).  $^{13}\text{C}$  NMR ( $\text{CDCl}_3$ , 100 MHz)  $\delta$ : 145.0, 138.3, 138.0, 136.8, 135.0, 131.4, 128.8, 128.6, 127.6, 127.4, 123.9, 121.0, 117.9, 76.4, 41.3, 26.3, 21.5, 18.4. HRMS (ESI):  $m/z$  calcd for  $\text{C}_{21}\text{H}_{23}\text{BrONa}$   $[\text{M} + \text{Na}]^+$ : 393.0830; Found: 393.0826.

Characterization of **2n**:

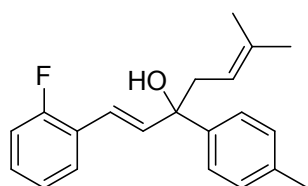

Yellow oil;  $^1\text{H}$  NMR ( $\text{CDCl}_3$ , 400 MHz)  $\delta$ : 7.45-7.38 (m, 3H), 7.20-7.14 (m, 3H), 7.06 (d,  $J = 7.6$  Hz, 1H), 7.01 (dd,  $J = 8.8$  Hz,  $J = 10.8$  Hz, 1H), 6.80 (d,  $J = 16.0$  Hz, 1H), 6.60 (d,  $J = 16.0$  Hz, 1H), 5.09 (t,  $J = 6.8$  Hz, 1H), 2.81-2.68 (m, 2H), 2.34 (s, 3H), 2.27 (s, 1H), 1.71 (s, 3H), 1.66 (s, 3H).  $^{13}\text{C}$  NMR ( $\text{CDCl}_3$ , 100 MHz)  $\delta$ : 160.5 ( $J = 247.9$  Hz), 142.8, 138.5 ( $J = 4.4$  Hz), 137.5, 136.6, 129.1, 128.7 ( $J = 8.0$  Hz), 127.8 ( $J = 3.7$  Hz), 125.6, 125.0, 124.9, 124.1 ( $J = 3.6$  Hz), 120.5 ( $J = 2.9$  Hz), 118.3, 115.9, 115.7, 76.6, 41.3, 26.2, 21.4, 18.4. HRMS (ESI):  $m/z$  calcd for  $\text{C}_{21}\text{H}_{23}\text{FONa}$   $[\text{M} + \text{Na}]^+$ : 333.1631; Found: 333.1631.



Characterization of **2o**:

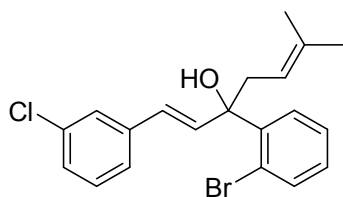

Colorless oil;  $^1\text{H}$  NMR ( $\text{CDCl}_3$ , 400 MHz)  $\delta$ : 7.80 (d,  $J = 7.6$  Hz, 1H), 7.58 (d,  $J = 7.6$  Hz, 1H), 7.36-7.24 (m, 5H), 7.12 (t,  $J = 7.2$  Hz, 1H), 6.87 (d,  $J = 16.0$  Hz, 1H), 6.52 (d,  $J = 16.0$  Hz, 1H), 5.07 (t,  $J = 7.6$  Hz, 1H), 3.12-2.92 (m, 2H), 2.65 (s, 1H), 1.70 (s, 3H), 1.67 (s, 3H).  $^{13}\text{C}$  NMR ( $\text{CDCl}_3$ , 100 MHz)  $\delta$ : 144.1, 137.3, 135.6, 134.9, 134.8, 133.2, 128.8, 128.7, 128.5, 127.8, 127.4, 120.8, 118.0, 76.8, 38.8, 26.1, 18.2. HRMS (ESI):  $m/z$  calcd for  $\text{C}_{20}\text{H}_{20}\text{BrClONa}$   $[\text{M} + \text{Na}]^+$ : 413.0284; Found: 413.0292.

Characterization of **2p**:

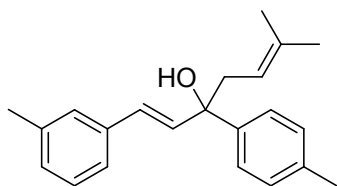

Colorless oil;  $^1\text{H}$  NMR ( $\text{CDCl}_3$ , 400 MHz)  $\delta$ : 7.40 (d,  $J = 8.0$  Hz, 2H), 7.21-7.14 (m, 5H), 7.03 (t,  $J = 3.2$  Hz, 1H), 6.59 (d,  $J = 16.0$  Hz, 1H), 6.49 (d,  $J = 16.0$  Hz, 1H), 5.11 (t,  $J = 7.6$  Hz, 1H), 2.78-2.68 (m, 2H), 2.34 (s, 3H), 2.32 (s, 3H), 2.23 (s, 1H), 1.71 (s, 3H), 1.66 (s, 3H).  $^{13}\text{C}$  NMR ( $\text{CDCl}_3$ , 100 MHz)  $\delta$ : 143.0, 138.2, 137.4, 137.1, 136.6, 135.8, 129.1, 128.6, 128.4, 128.1, 127.4, 125.6, 123.9, 118.5, 76.5, 41.4, 26.3, 21.5, 21.2, 18.4. HRMS (ESI):  $m/z$  calcd for  $\text{C}_{22}\text{H}_{26}\text{ONa}$   $[\text{M} + \text{Na}]^+$ : 329.1881; Found: 329.1876.

Characterization of **2q**:

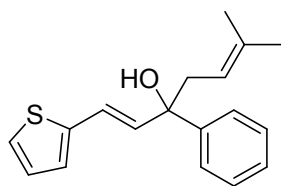

Yellow oil;  $^1\text{H}$  NMR ( $\text{CDCl}_3$ , 400 MHz)  $\delta$ : 7.50 (d,  $J = 8.0$  Hz, 2H), 7.36 (t,  $J = 8.0$  Hz, 2H), 7.27-7.23 (m, 1H), 7.14-7.13 (m, 1H), 6.94-6.93 (m, 2H), 6.76 (d,  $J = 16.0$  Hz, 1H), 6.36 (d,  $J$

= 16.0 Hz, 1H), 5.07 (t,  $J = 7.2$  Hz, 1H), 2.78-2.67 (m, 2H), 2.26 (s, 1H), 1.71 (s, 3H), 1.66 (s, 3H).  $^{13}\text{C}$  NMR ( $\text{CDCl}_3$ , 100 MHz)  $\delta$ : 145.7, 142.4, 137.8, 135.4, 128.4, 127.5, 127.1, 125.9, 125.7, 124.2, 121.8, 118.1, 76.4, 41.4, 26.2, 18.4. HRMS (ESI):  $m/z$  calcd for  $\text{C}_{18}\text{H}_{20}\text{OSNa}$   $[\text{M} + \text{Na}]^+$ : 307.1133; Found: 307.1134.

#### Characterization of **2r**:

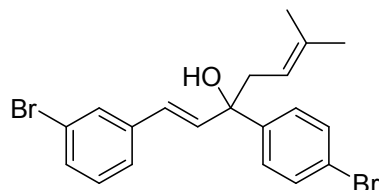

Yellow oil;  $^1\text{H}$  NMR ( $\text{CDCl}_3$ , 400 MHz)  $\delta$ : 7.52 (s, 1H), 7.48 (d,  $J = 8.0$  Hz, 2H), 7.37 (d,  $J = 8.4$  Hz, 2H), 7.34 (d,  $J = 8.8$  Hz, 1H), 7.26 (d,  $J = 7.2$  Hz, 1H), 7.16 (t,  $J = 8.0$  Hz, 1H), 6.56 (d,  $J = 16.0$  Hz, 1H), 6.46 (d,  $J = 16.0$  Hz, 1H), 5.03 (t,  $J = 7.2$  Hz, 1H), 2.73-2.71 (m, 2H), 2.28 (s, 1H), 1.72 (s, 3H), 1.66 (s, 3H).  $^{13}\text{C}$  NMR ( $\text{CDCl}_3$ , 100 MHz)  $\delta$ : 144.4, 138.9, 138.5, 136.5, 131.4, 130.5, 130.1, 129.3, 127.4, 127.0, 125.3, 122.8, 121.0, 117.3, 76.1, 41.1, 26.2, 18.3. HRMS (ESI):  $m/z$  calcd for  $\text{C}_{20}\text{H}_{20}\text{Br}_2\text{ONa}$   $[\text{M} + \text{Na}]^+$ : 456.9779; Found: 456.9780.

#### Characterization of **2s**:

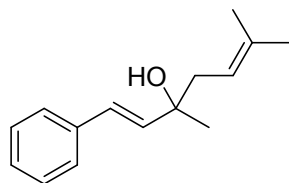

Yellow oil;  $^1\text{H}$  NMR ( $\text{CDCl}_3$ , 400 MHz)  $\delta$ : 7.39 (d,  $J = 8.0$  Hz, 2H), 7.32 (t,  $J = 8.0$  Hz, 2H), 7.22 (t,  $J = 8.0$  Hz, 1H), 6.59 (d,  $J = 16.0$  Hz, 1H), 6.30 (d,  $J = 16.0$  Hz, 1H), 5.19 (t,  $J = 7.8$  Hz, 1H), 2.46-2.25 (m, 2H), 1.78 (s, 1H), 1.78 (s, 3H), 1.74 (s, 3H), 1.38 (s, 3H).  $^{13}\text{C}$  NMR ( $\text{CDCl}_3$ , 100 MHz)  $\delta$ : 137.1, 136.7, 136.2, 128.6, 127.3, 127.1, 126.4, 118.8, 73.3, 41.4, 27.9, 26.1, 18.1. HRMS (ESI):  $m/z$  calcd for  $\text{C}_{15}\text{H}_{20}\text{ONa}$   $[\text{M} + \text{Na}]^+$ : 239.1412; Found: 239.1421.

#### Characterization of **2t**:

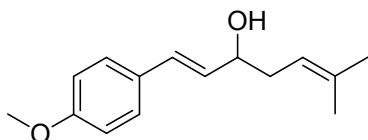

Yellow oil;  $^1\text{H NMR}$  ( $\text{CDCl}_3$ , 400 MHz)  $\delta$ : 7.32 (d,  $J = 8.0$  Hz, 2H), 6.86 (d,  $J = 8.0$  Hz, 2H), 6.54 (d,  $J = 16.0$  Hz, 1H), 6.12 (dd,  $J = 6.4$  Hz,  $J = 16.0$  Hz, 1H), 5.20 (t,  $J = 7.2$  Hz, 1H), 4.28 (s, 1H), 3.81 (s, 3H), 2.39-2.31 (m, 2H), 1.75 (s, 3H), 1.66 (s, 3H).  $^{13}\text{C NMR}$  ( $\text{CDCl}_3$ , 100 MHz)  $\delta$ : 159.0, 135.3, 129.6, 129.5, 129.3, 127.4, 119.2, 113.7, 72.5, 55.1, 36.2, 25.7, 17.8. HRMS (ESI):  $m/z$  calcd for  $\text{C}_{15}\text{H}_{20}\text{O}_2\text{Na}$   $[\text{M} + \text{Na}]^+$ : 255.1361; Found: 255.1353.

Characterization of **2u**:

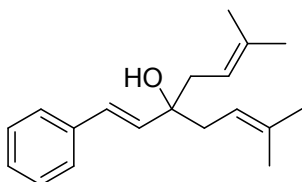

Pale yellow oil;  $^1\text{H NMR}$  (400MHz,  $\text{CDCl}_3$ )  $\delta$ : 7.39-7.37 (m, 2H), 7.33-7.30 (m, 2H), 7.25-7.22 (m, 1H), 6.58 (d,  $J = 16.0$  Hz, 1H), 6.25 (d,  $J = 16.0$  Hz, 1H), 5.20 (s, 2H), 2.43-2.27 (m, 4H), 1.86 (s, 1H), 1.73 (s, 6H), 1.64 (s, 6H).  $^{13}\text{C NMR}$  (100MHz,  $\text{CDCl}_3$ )  $\delta$ : 137.3, 135.7, 135.6, 128.6, 127.9, 127.2, 126.4, 118.8, 75.6, 39.6, 26.1, 18.1. HRMS (ESI):  $m/z$  calcd for  $\text{C}_{19}\text{H}_{26}\text{ONa}$   $[\text{M} + \text{Na}]^+$ : 293.1881; Found: 293.1889.

Characterization of **2v**:

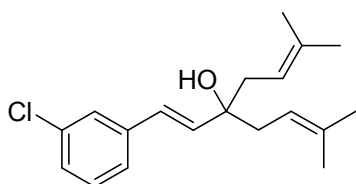

Pale yellow oil;  $^1\text{H NMR}$  ( $\text{CDCl}_3$ , 400 MHz)  $\delta$ : 7.36 (s, 1H), 7.24-7.19 (m, 3H), 6.54 (d,  $J = 16.0$  Hz, 1H), 6.26 (d,  $J = 16.0$  Hz, 1H), 5.18 (t,  $J = 7.2$  Hz, 1H), 2.43-2.37 (m, 2H), 2.32-2.26 (m, 2H), 1.87 (s, 1H), 1.74 (s, 6H), 1.64 (s, 6H).  $^{13}\text{C NMR}$  ( $\text{CDCl}_3$ , 100 MHz)  $\delta$ : 139.2, 137.3, 136.0, 134.5, 129.8, 127.1, 126.7, 126.2, 124.7, 118.5, 75.5, 39.5, 26.1, 18.1. HRMS (ESI):  $m/z$  calcd for  $\text{C}_{19}\text{H}_{25}\text{ClONa}$   $[\text{M} + \text{Na}]^+$ : 327.1492; Found: 327.1490.

## 6 Characterization of 3a, 3h, 3j, 3l, and 3w:

### Characterization of 3a:

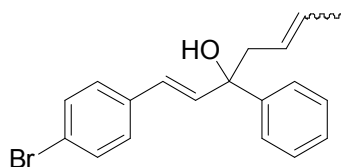

Yellow oil;  $^1\text{H}$  NMR ( $\text{CDCl}_3$ , 400 MHz)  $\delta$ : 7.51 (t,  $J = 7.6$  Hz, 2H), 7.41 (d,  $J = 7.2$  Hz, 2H), 7.37 (t,  $J = 8.0$  Hz, 2H), 7.30-7.22 (m, 3H), 6.61 (d,  $J = 10.4$  Hz, 0.28H, isomer 1), 6.57 (d,  $J = 10.8$  Hz, 0.72H, isomer 2), 6.54 (d,  $J = 14.0$  Hz, 0.73H, isomer 2), 6.50 (d,  $J = 16.0$  Hz, 0.27H, isomer 1), 5.75-5.62 (m, 1H), 5.38-5.26 (m, 1H), 2.83-2.69 (m, 2H), 2.36 (s, 0.48H, isomer 1), 2.26 (s, 0.52H, isomer 2), 1.66 (t,  $J = 6.0$  Hz, 3H).  $^{13}\text{C}$  NMR ( $\text{CDCl}_3$ , 100 Hz): 145.4, 145.4, 136.4, 136.3, 136.0, 136.0, 132.0, 131.8, 131.8, 129.6, 128.5, 128.5, 128.2, 127.2, 127.2, 127.1, 127.1, 125.6, 125.6, 125.1, 124.2, 121.4, 121.4, 76.5, 75.7, 46.0, 40.0, 18.3, 13.4. HRMS (ESI):  $m/z$  calcd for  $\text{C}_{19}\text{H}_{19}\text{OBrNa}$  [ $\text{M} + \text{Na}$ ] $^+$ : 365.0517; Found: 365.0517.

### Characterization of 3h:

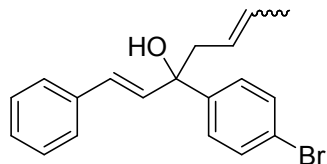

Yellow oil;  $^1\text{H}$  NMR ( $\text{CDCl}_3$ , 400 MHz)  $\delta$ : 7.48 (d,  $J = 8.4$  Hz, 2H), 7.41-7.37 (m, 4H), 7.31 (t,  $J = 7.2$  Hz, 2H), 7.26-7.22 (m, 1H), 6.64 (d,  $J = 9.2$  Hz, 0.38H, isomer 1), 6.60 (d,  $J = 9.2$  Hz, 0.62H, isomer 2), 6.49 (d,  $J = 14.8$  Hz, 0.62H, isomer 2), 6.45 (d,  $J = 15.6$  Hz, 0.38H, isomer 1), 5.76-5.62 (m, 1H), 5.38-5.27 (m, 1H), 2.83-2.68 (m, 2H), 2.36 (s, 0.48H, isomer 1), 2.26 (s, 0.52H, isomer 2), 1.67 (t,  $J = 8.4$  Hz, 3H).  $^{13}\text{C}$  NMR ( $\text{CDCl}_3$ , 100 Hz): 144.8, 144.7, 136.8, 136.7, 135.0, 134.9, 132.2, 131.5, 129.7, 128.9, 128.8, 128.8, 128.8, 127.9, 127.8, 127.6, 126.7, 124.9, 124.0, 121.1, 121.0, 76.3, 75.6, 46.1, 40.0, 18.4, 13.4. HRMS (ESI):  $m/z$  calcd for  $\text{C}_{19}\text{H}_{19}\text{OBrNa}$  [ $\text{M} + \text{Na}$ ] $^+$ : 365.0517; Found: 365.0517.

### Characterization of 3j:

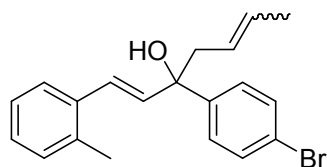

Yellow oil;  $^1\text{H}$  NMR ( $\text{CDCl}_3$ , 400 MHz)  $\delta$ : 7.50 (d,  $J = 8.4$  Hz, 2H), 7.44-7.40 (m, 3H), 7.19-7.16 (m, 3H), 6.90 (d,  $J = 8.4$  Hz, 0.48H, isomer 1), 6.86 (d,  $J = 8.4$  Hz, 0.52H, isomer 2), 6.38 (d,  $J = 15.6$  Hz, 0.52H, isomer 2), 6.35 (d,  $J = 15.2$  Hz, 0.48H, isomer 1), 5.78-5.64 (m, 1H), 5.42-5.31 (m, 1H), 2.85-2.70 (m, 2H), 2.39 (s, 0.40H, isomer 1), 2.34 (s, 3H), 2.30 (s, 0.60H, isomer 2), 1.71 (d,  $J = 6.4$  Hz, 1.20H, isomer 1), 1.68 (d,  $J = 6.8$  Hz, 1.80H, isomer 2).  $^{13}\text{C}$  NMR ( $\text{CDCl}_3$ , 100 Hz): 144.8, 144.8, 136.3, 136.2, 135.9, 135.8, 135.7, 131.8, 131.3, 130.3, 130.3, 129.4, 127.6, 127.6, 127.5, 127.4, 126.7, 126.6, 126.1, 126.1, 125.7, 125.7, 124.9, 123.9, 120.9, 120.8, 76.3, 75.6, 46.0, 40.0, 19.9, 18.2, 13.2. HRMS (ESI):  $m/z$  calcd for  $\text{C}_{20}\text{H}_{21}\text{OBrNa}$   $[\text{M} + \text{Na}]^+$ : 379.0673; Found: 379.0652.

Characterization of **3l**:

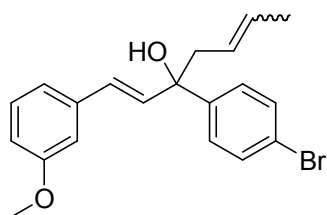

Pale yellow oil;  $^1\text{H}$  NMR ( $\text{CDCl}_3$ , 400 MHz)  $\delta$ : 7.48 (d,  $J = 8.0$  Hz, 2H), 7.39 (t,  $J = 7.2$  Hz, 2H), 7.23 (t,  $J = 8.4$  Hz, 1H), 6.97 (d,  $J = 7.6$  Hz, 1H), 6.80 (d,  $J = 8.0$  Hz, 1H), 6.61 (d,  $J = 9.2$  Hz, 0.36H, isomer 1), 6.57 (d,  $J = 8.8$  Hz, 0.64H, isomer 2), 6.48 (d,  $J = 14.4$  Hz, 0.64H, isomer 2), 6.44 (d,  $J = 16.0$  Hz, 0.36H, isomer 1), 5.76-5.62 (m, 1H), 5.37-5.26 (m, 1H), 3.81 (s, 3H), 2.83-2.68 (m, 2H), 2.38 (s, 0.60H, isomer 1), 2.27 (s, 0.40H, isomer 2), 1.67 (t,  $J = 7.6$  Hz, 3H).  $^{13}\text{C}$  NMR ( $\text{CDCl}_3$ , 100 Hz): 160.0, 160.0, 144.7, 138.2, 138.2, 135.2, 135.2, 132.2, 131.5, 129.7, 129.7, 128.8, 128.7, 127.6, 127.6, 124.9, 124.0, 121.1, 121.0, 119.4, 113.5, 113.5, 112.0, 76.3, 75.5, 55.4, 46.0, 40.0, 18.4, 13.4. HRMS (ESI):  $m/z$  calcd for  $\text{C}_{20}\text{H}_{21}\text{O}_2\text{BrNa}$   $[\text{M} + \text{Na}]^+$ : 395.0623; Found: 395.0623.

Characterization of **3w**:

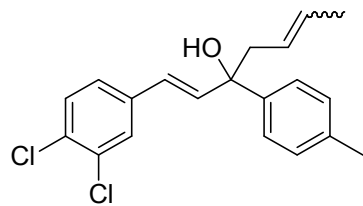

Pale yellow oil;  $^1\text{H}$  NMR ( $\text{CDCl}_3$ , 400 MHz)  $\delta$ : 7.45-7.34 (m, 4H), 7.19-7.17 (m, 3H), 8.59-6.44 (m, 2H), 5.76-5.62 (m, 1H), 5.36-5.25 (m, 1H), 2.85-2.63 (m, 2H), 2.35 (s, 3H), 2.35 (s, 0.25H, isomer 1), 2.23 (s, 0.75H, isomer 2), 1.67 (d,  $J = 6.8$  Hz, 3H).  $^{13}\text{C}$  NMR ( $\text{CDCl}_3$ , 100 MHz)  $\delta$ : 142.6, 138.2, 138.1, 137.7, 137.6, 137.4, 137.2, 133.1, 133.1, 132.4, 131.5, 130.9, 130.9, 130.0, 129.6, 129.6, 128.7, 128.7, 126.3, 126.2, 126.1, 125.8, 125.8, 125.4, 124.5, 76.7, 75.9, 46.2, 40.2, 21.5, 18.7, 13.7. HRMS (ESI):  $m/z$  calcd for  $\text{C}_{20}\text{H}_{20}\text{OCl}_2\text{Na}$  [ $\text{M} + \text{Na}$ ] $^+$ : 369.0789; Found: 369.0780.

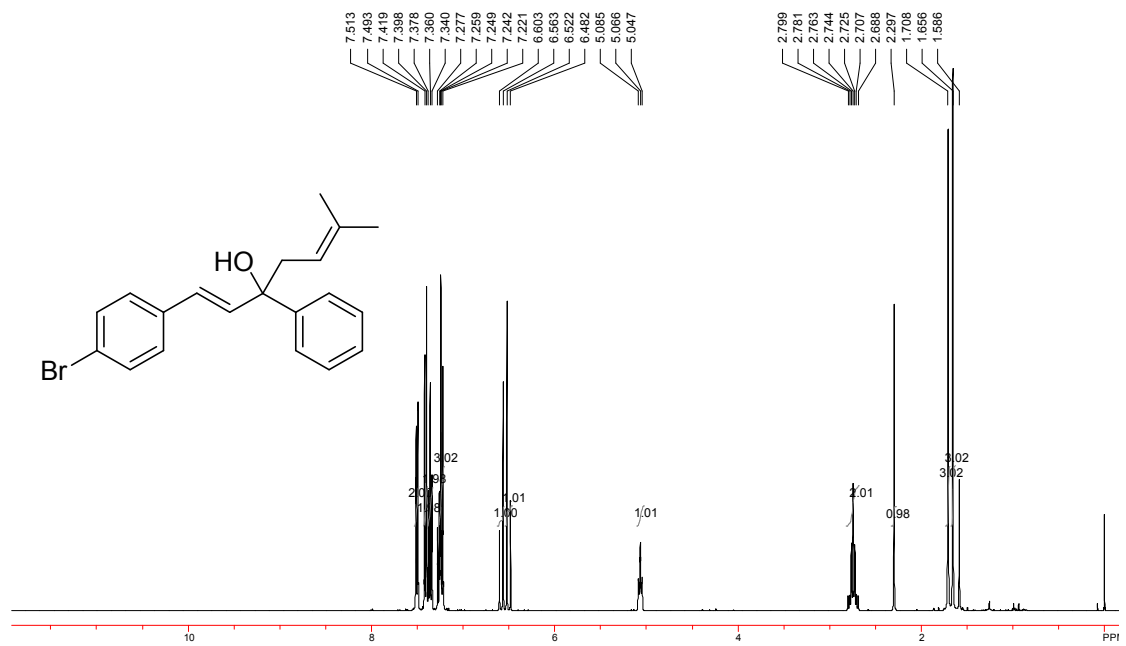

<sup>1</sup>H NMR Spectrum (400 MHz, CDCl<sub>3</sub>) of Compound 2a





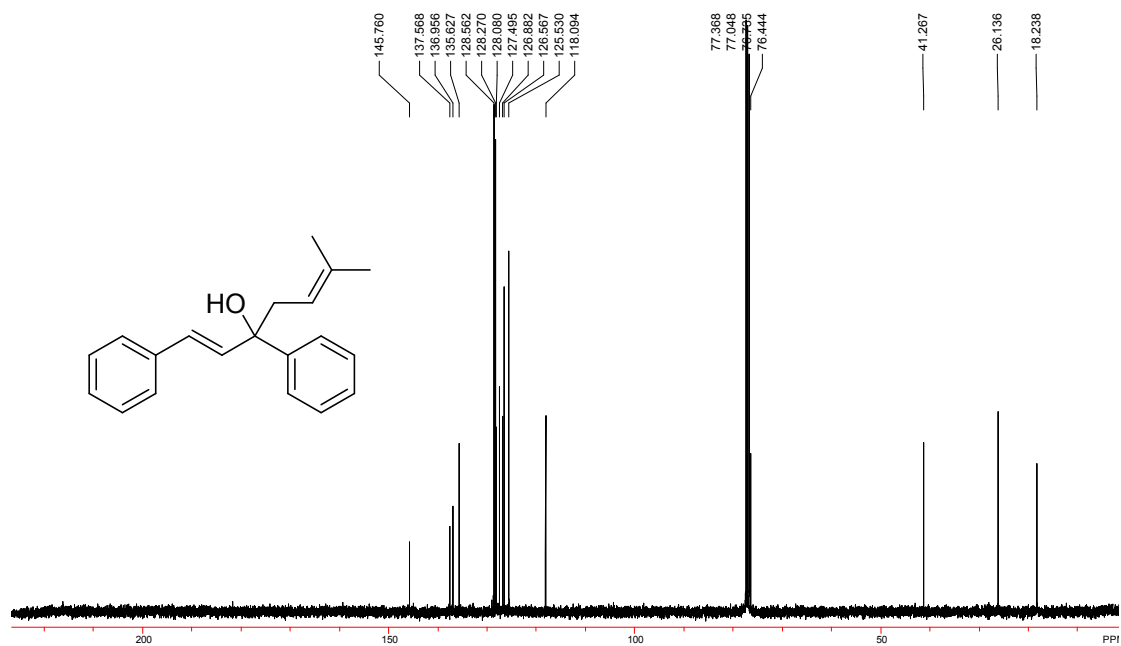

<sup>13</sup>C NMR Spectrum (100 MHz, CDCl<sub>3</sub>) of Compound **2b**

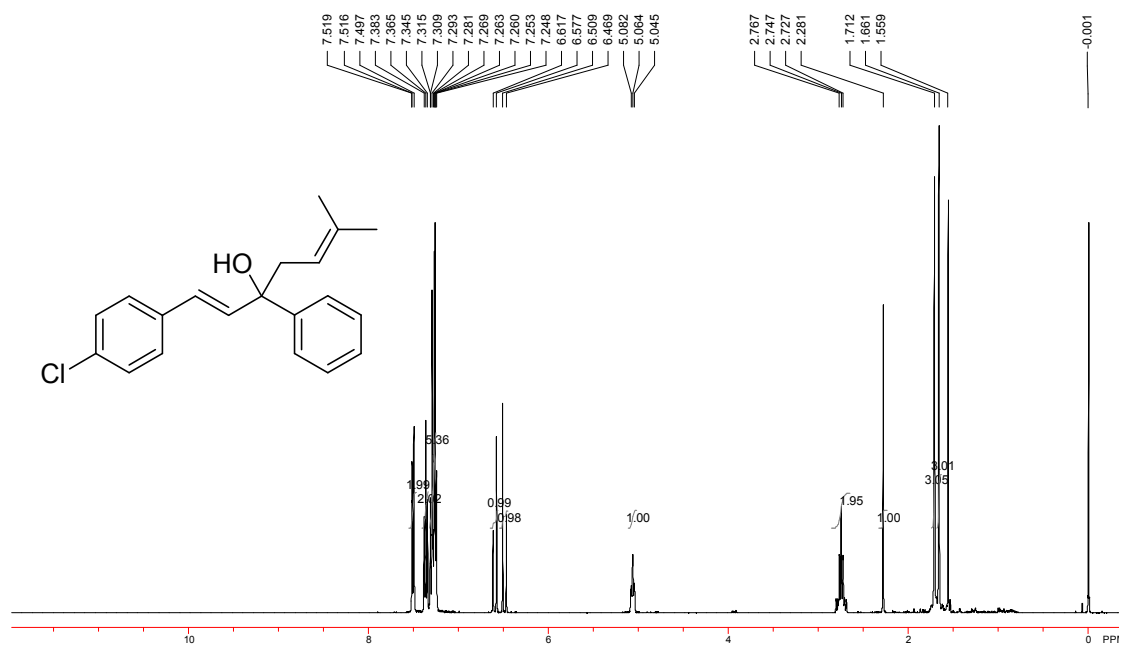

<sup>1</sup>H NMR Spectrum (400 MHz, CDCl<sub>3</sub>) of Compound **2c**

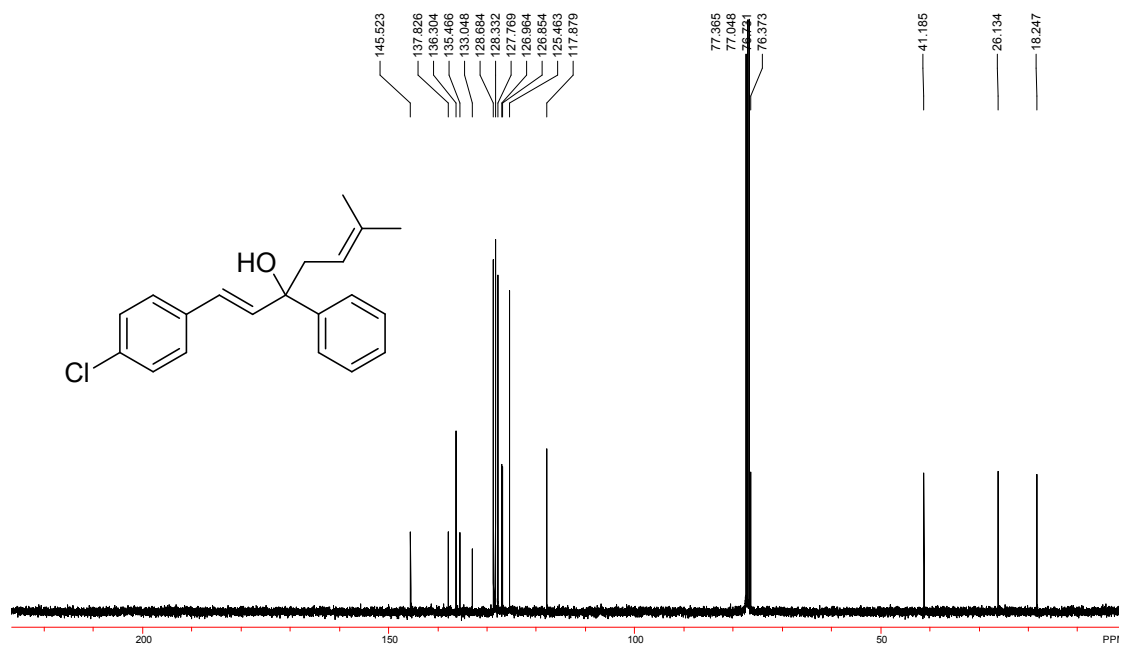

<sup>13</sup>C NMR Spectrum (100 MHz, CDCl<sub>3</sub>) of Compound **2c**

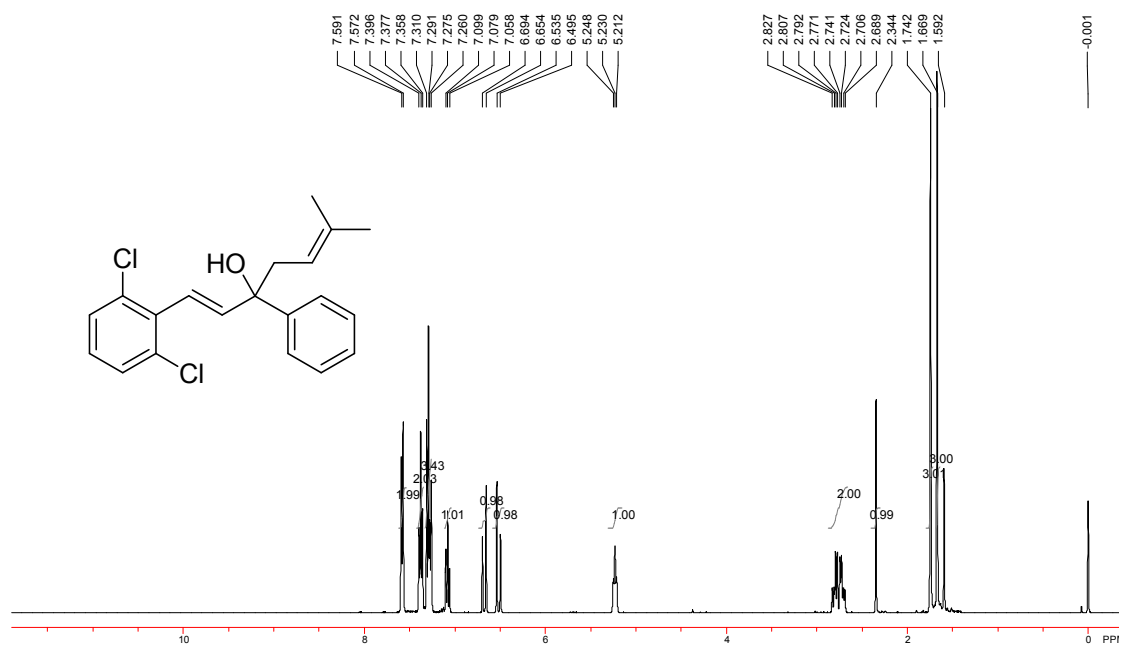

<sup>1</sup>H NMR Spectrum (400 MHz, CDCl<sub>3</sub>) of Compound **2d**

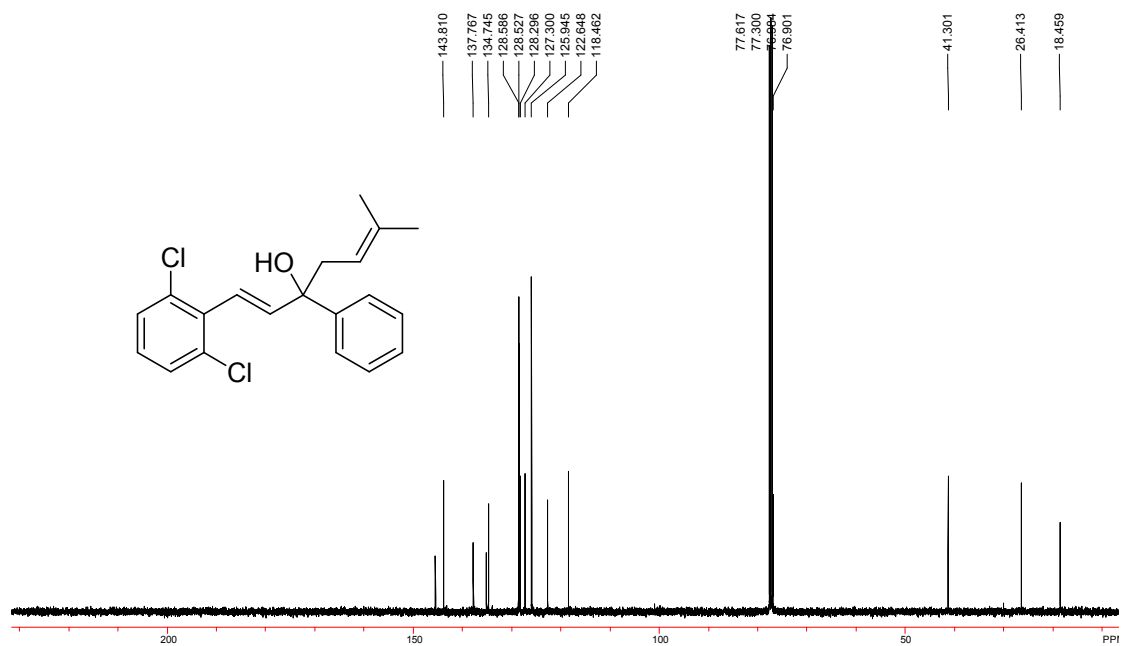

<sup>13</sup>C NMR Spectrum (100 MHz, CDCl<sub>3</sub>) of Compound **2d**

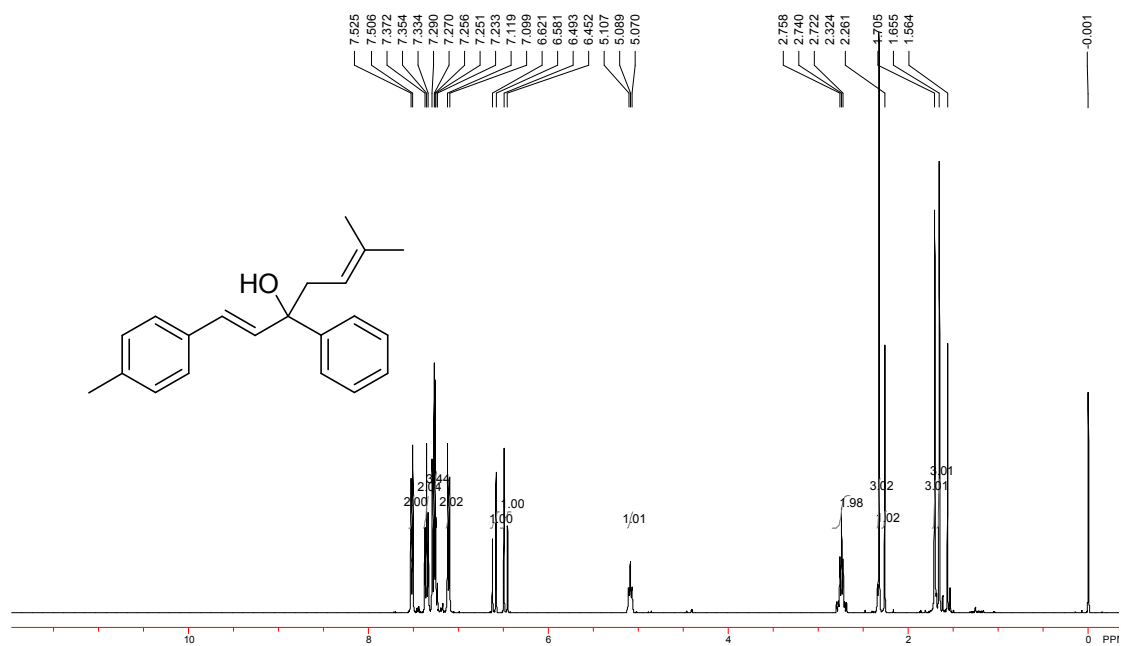

<sup>1</sup>H NMR Spectrum (400 MHz, CDCl<sub>3</sub>) of Compound **2e**

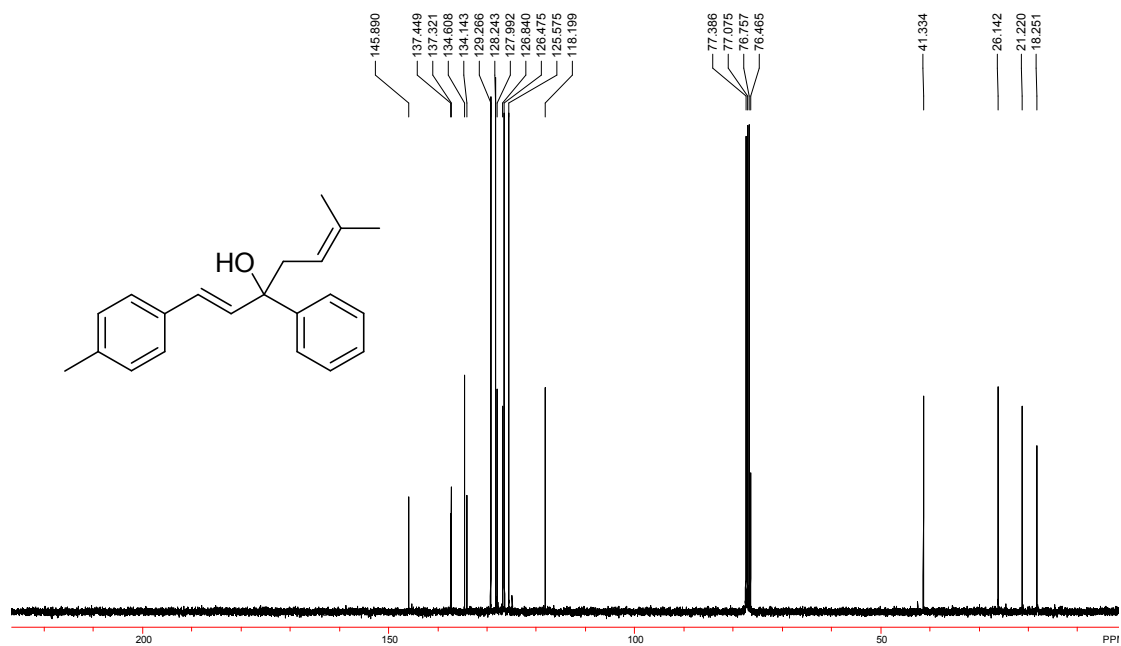

<sup>13</sup>C NMR Spectrum (100 MHz, CDCl<sub>3</sub>) of Compound 2e

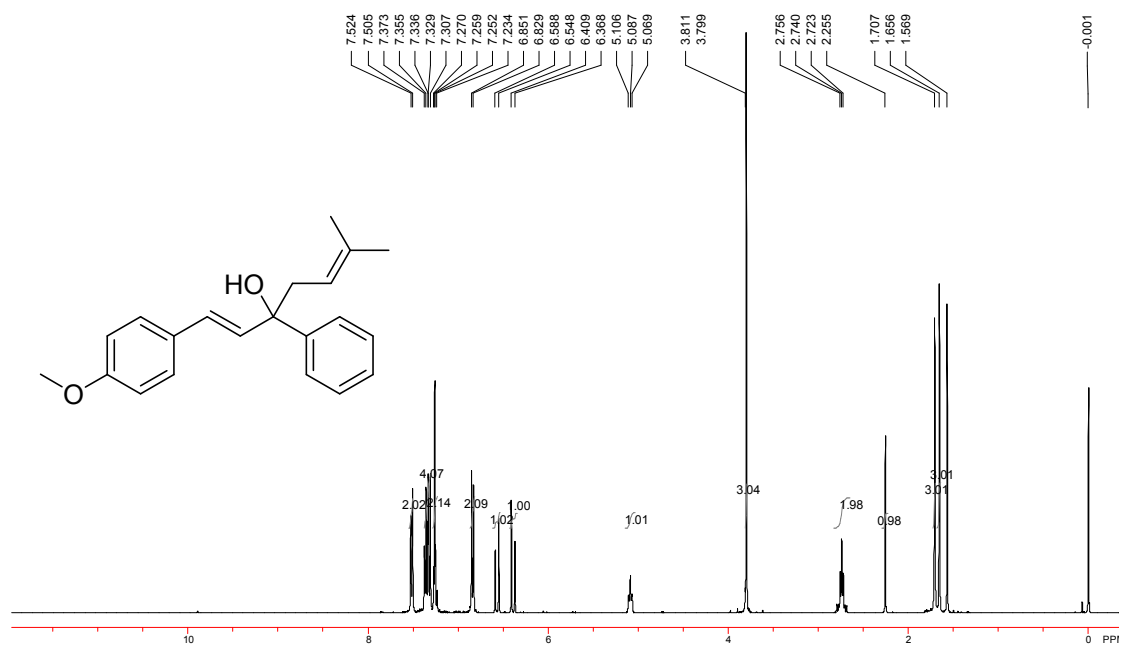

<sup>1</sup>H NMR Spectrum (400 MHz, CDCl<sub>3</sub>) of Compound 2f

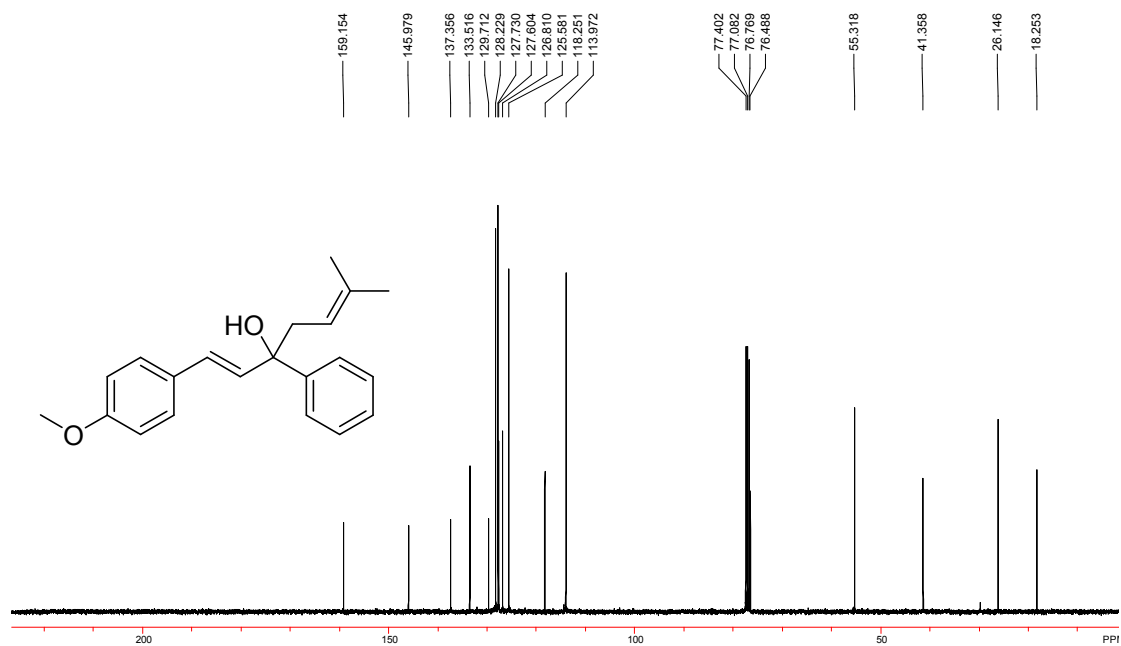

<sup>13</sup>C NMR Spectrum (100 MHz, CDCl<sub>3</sub>) of Compound **2f**

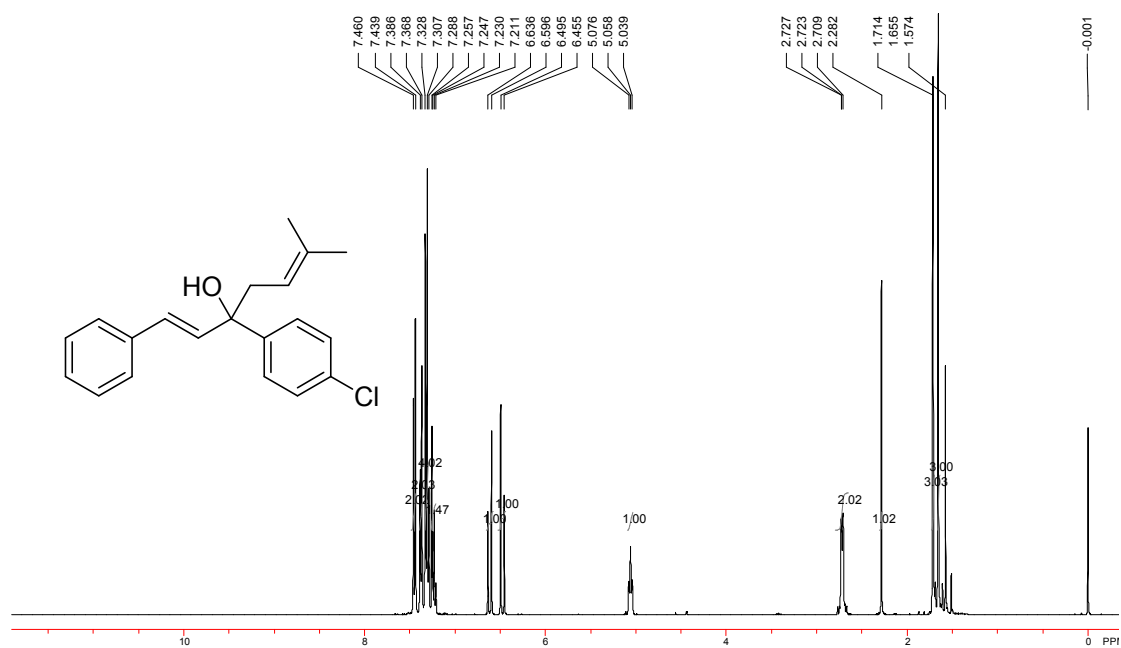

<sup>1</sup>H NMR Spectrum (400 MHz, CDCl<sub>3</sub>) of Compound **2g**

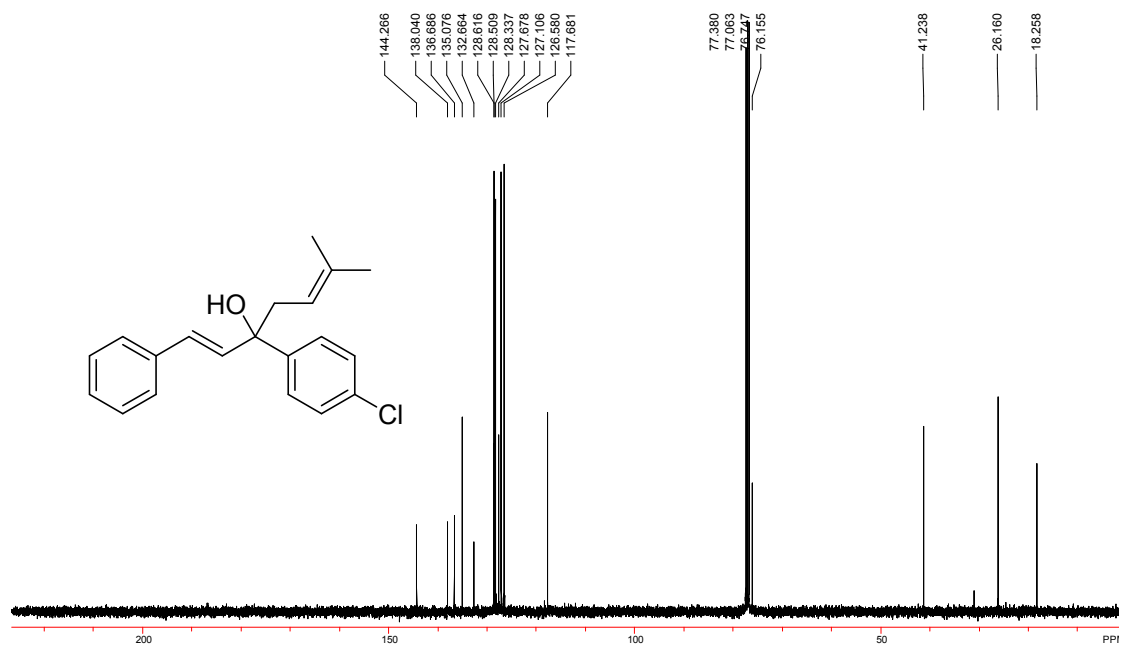

<sup>13</sup>C NMR Spectrum (100 MHz, CDCl<sub>3</sub>) of Compound **2g**

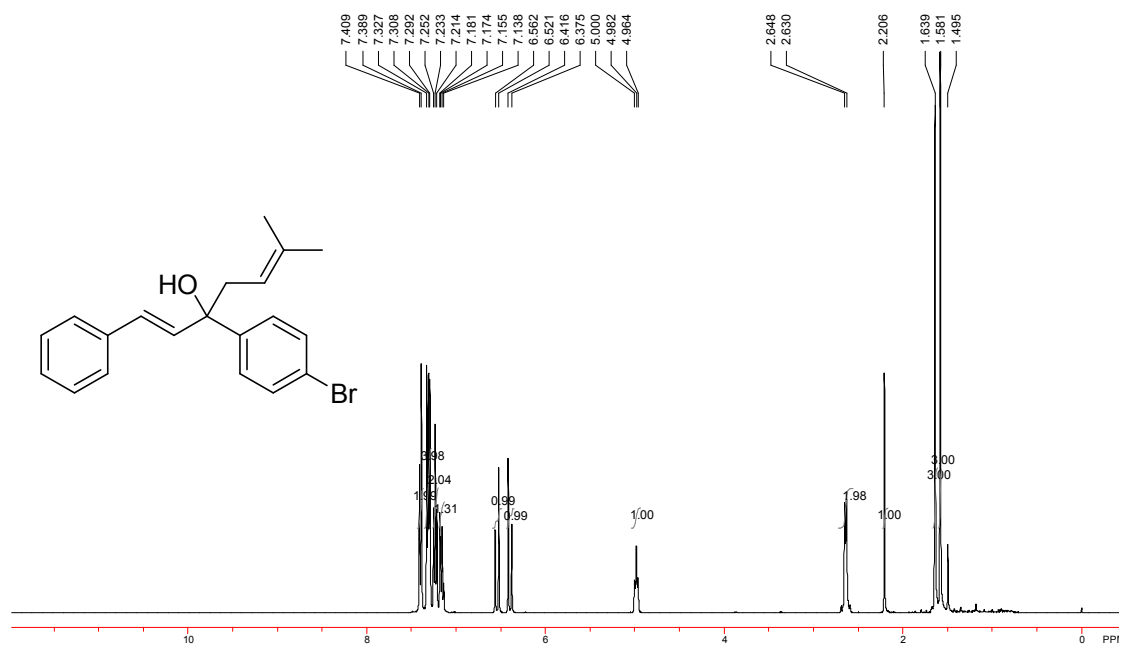

<sup>1</sup>H NMR Spectrum (400 MHz, CDCl<sub>3</sub>) of Compound **2h**

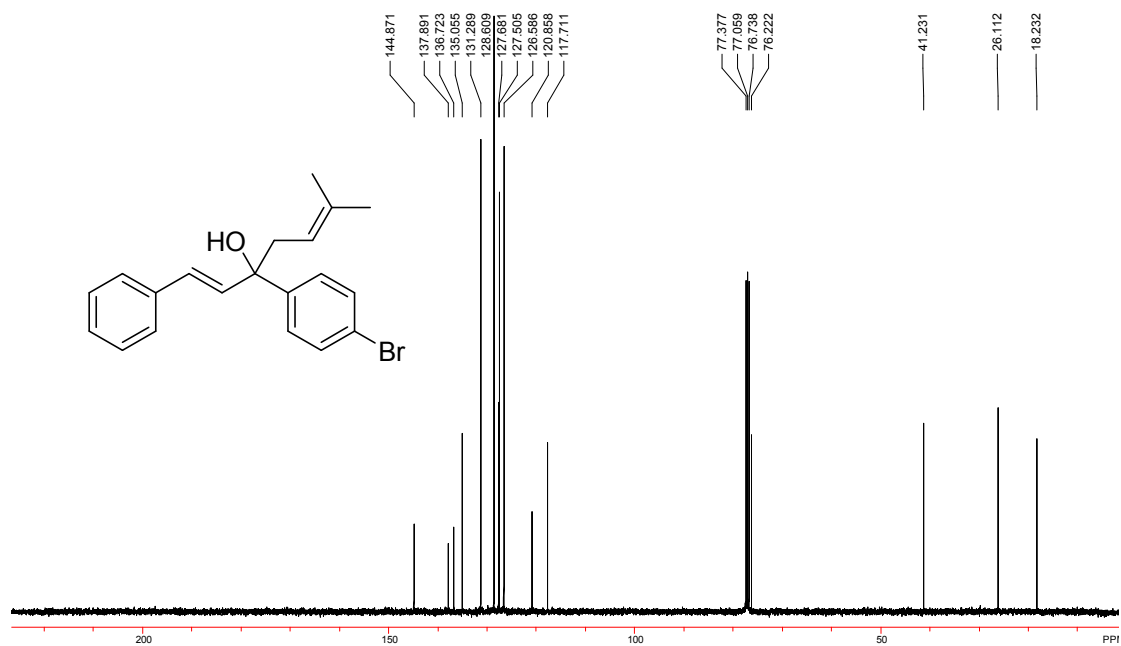

<sup>13</sup>C NMR Spectrum (100 MHz, CDCl<sub>3</sub>) of Compound 2h

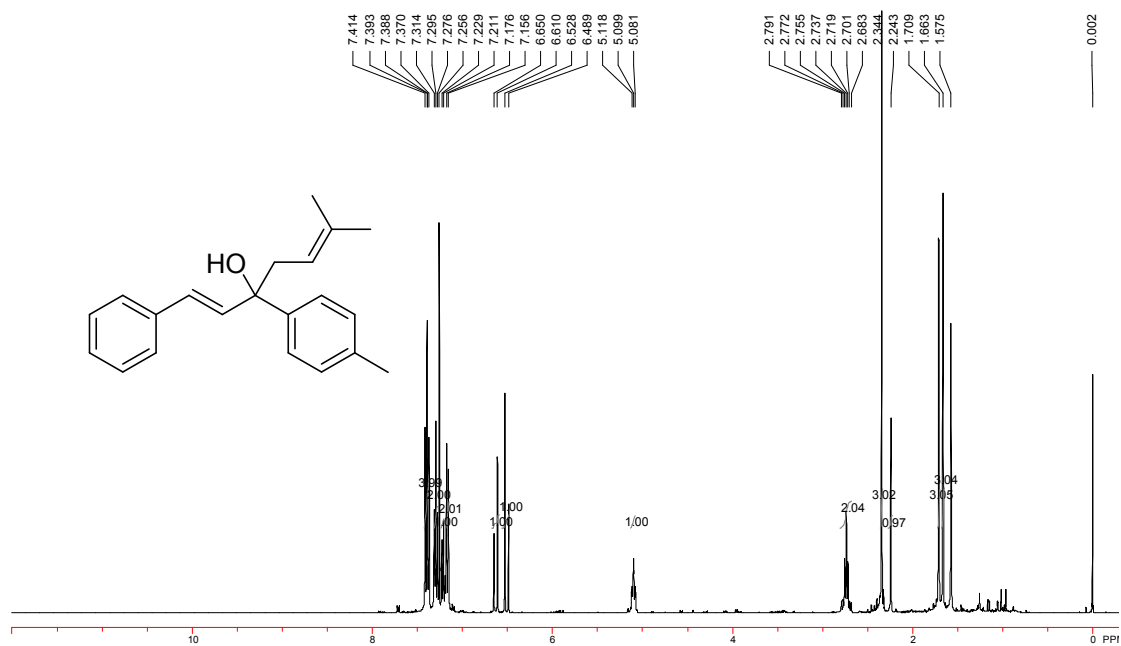

<sup>1</sup>H NMR Spectrum (400 MHz, CDCl<sub>3</sub>) of Compound 2i

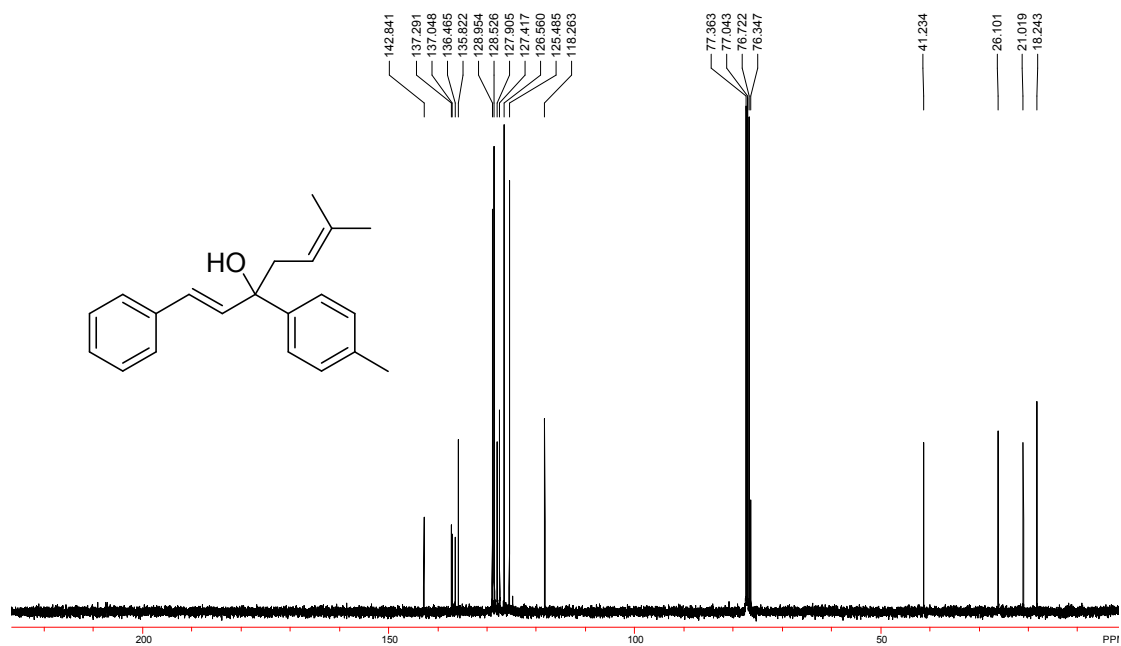

<sup>13</sup>C NMR Spectrum (100 MHz, CDCl<sub>3</sub>) of Compound **2i**

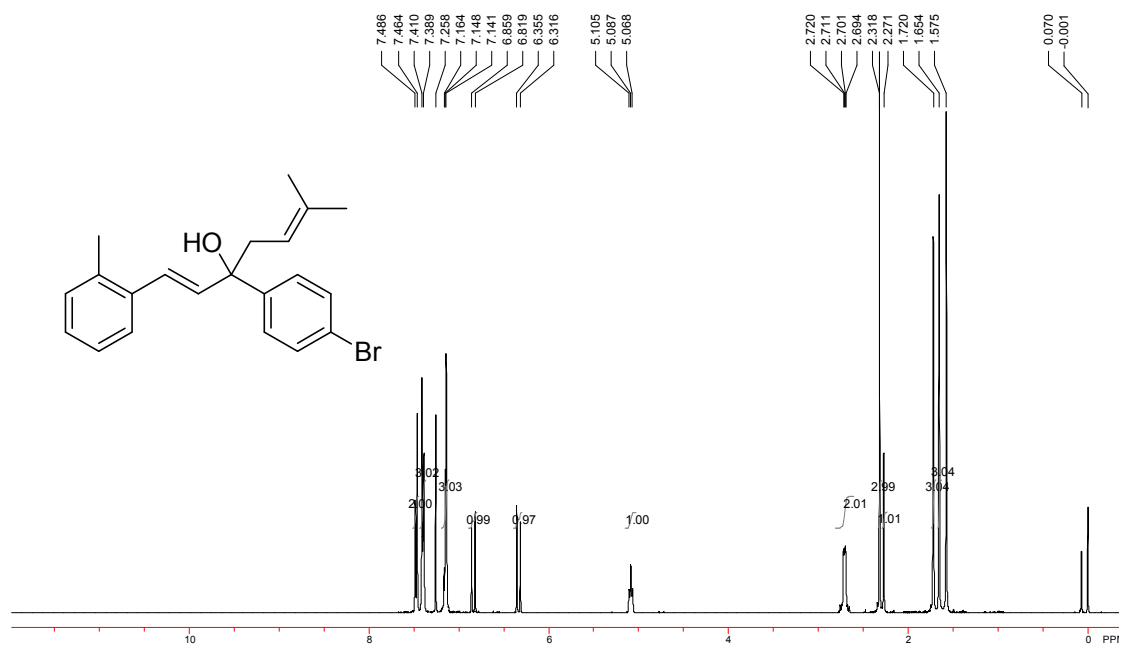

<sup>1</sup>H NMR Spectrum (400 MHz, CDCl<sub>3</sub>) of Compound **2j**



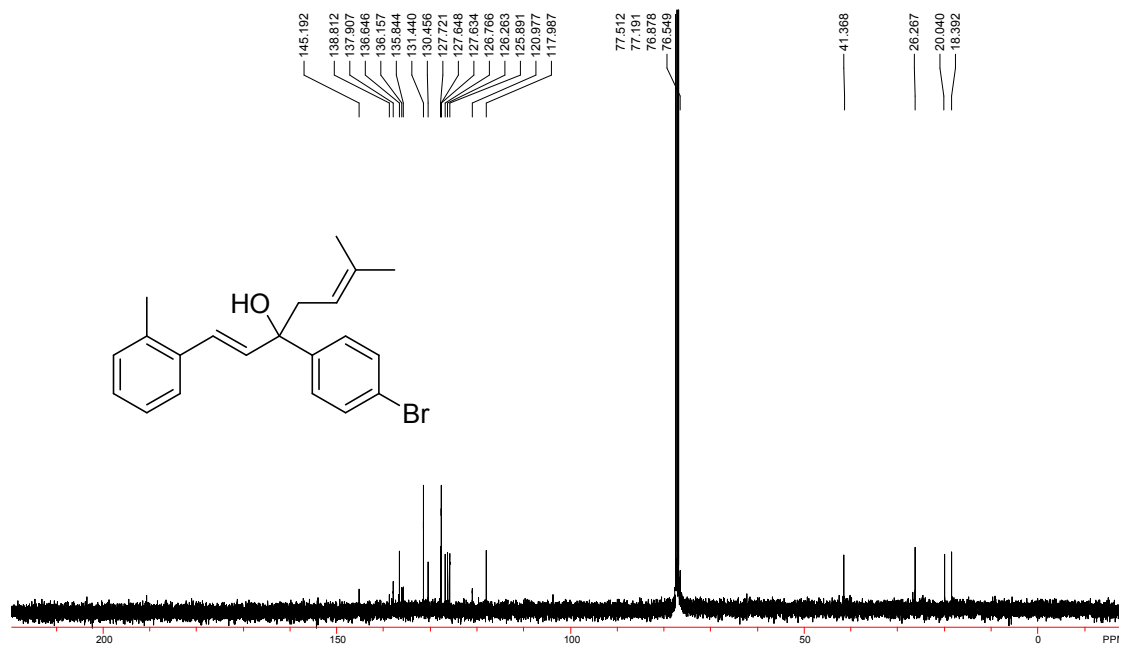

**<sup>13</sup>C NMR Spectrum (100 MHz, CDCl<sub>3</sub>) of Compound 2j**

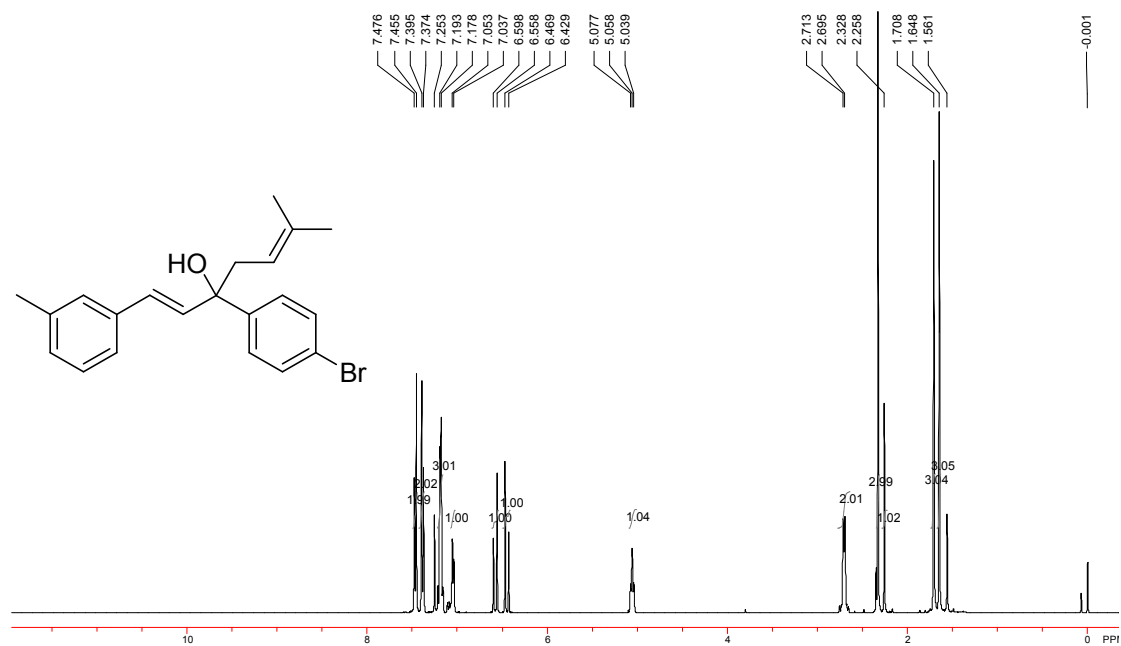

**<sup>1</sup>H NMR Spectrum (400 MHz, CDCl<sub>3</sub>) of Compound 2k**



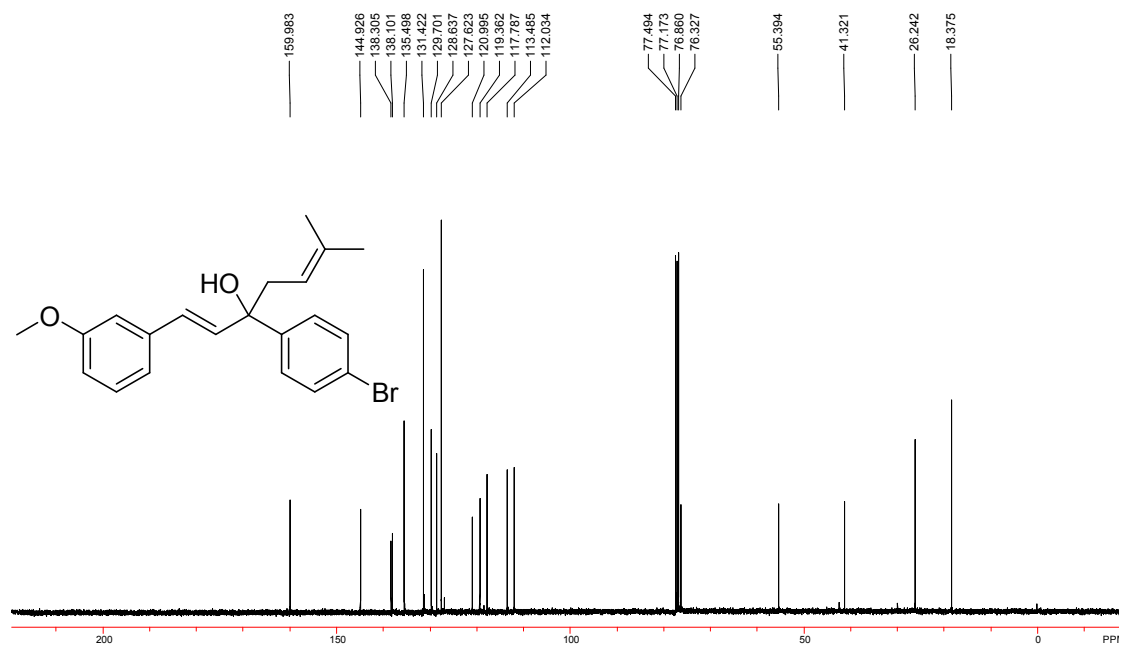

**<sup>13</sup>C NMR Spectrum (100 MHz, CDCl<sub>3</sub>) of Compound 2l**

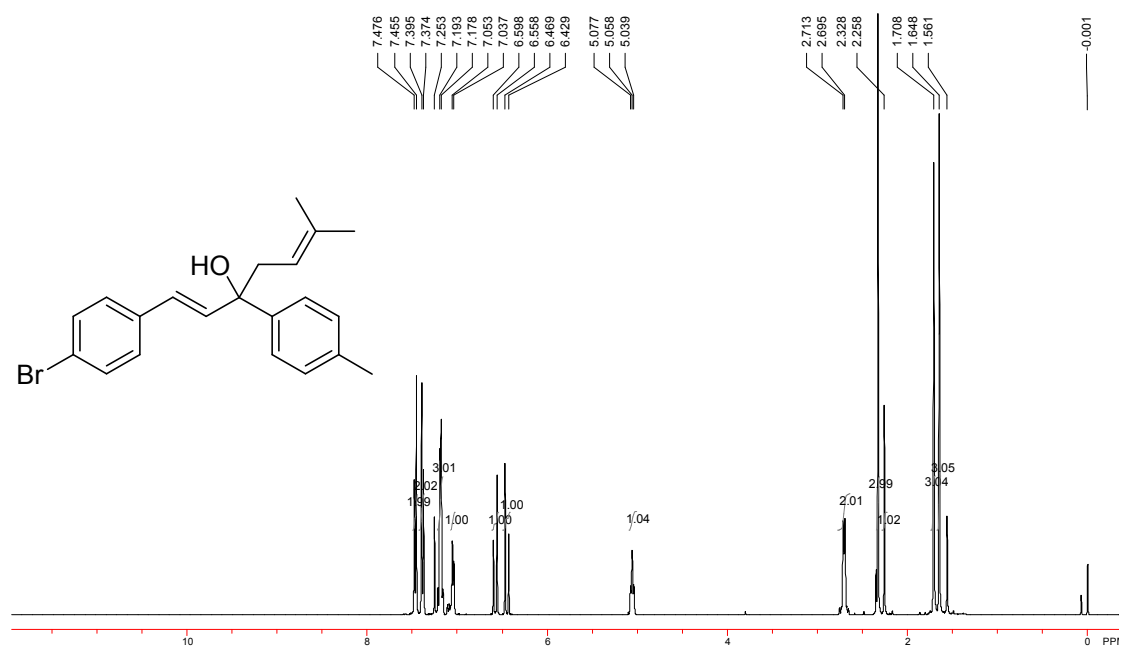

**<sup>1</sup>H NMR Spectrum (400 MHz, CDCl<sub>3</sub>) of Compound 2m**

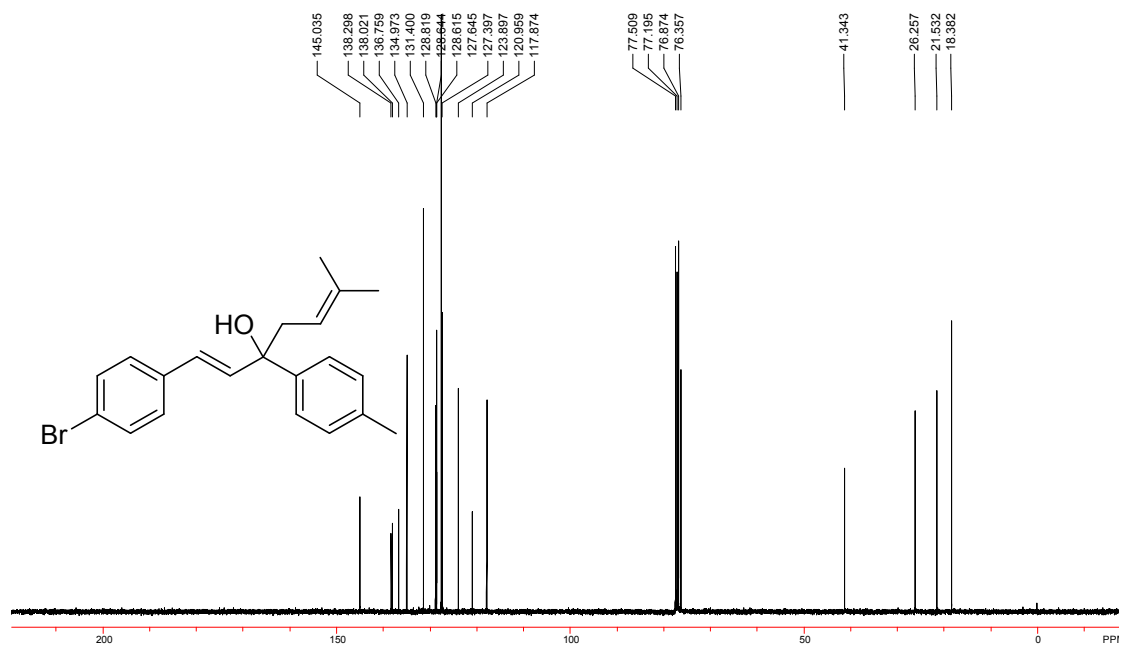

<sup>13</sup>C NMR Spectrum (100 MHz, CDCl<sub>3</sub>) of Compound **2m**

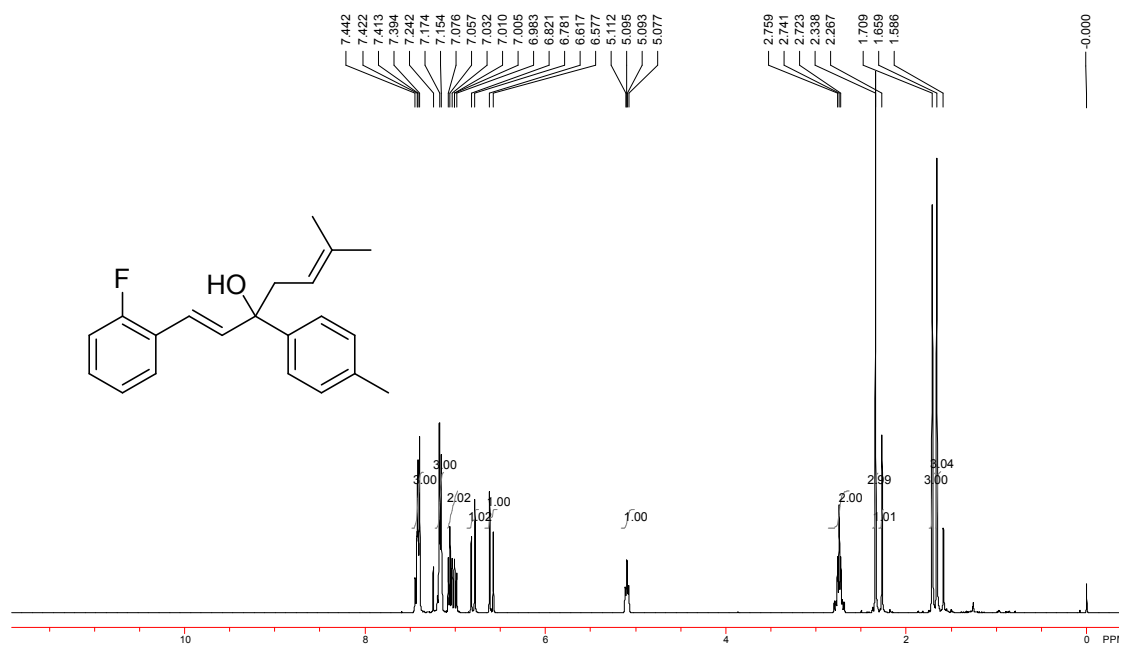

<sup>1</sup>H NMR Spectrum (400 MHz, CDCl<sub>3</sub>) of Compound **2n**

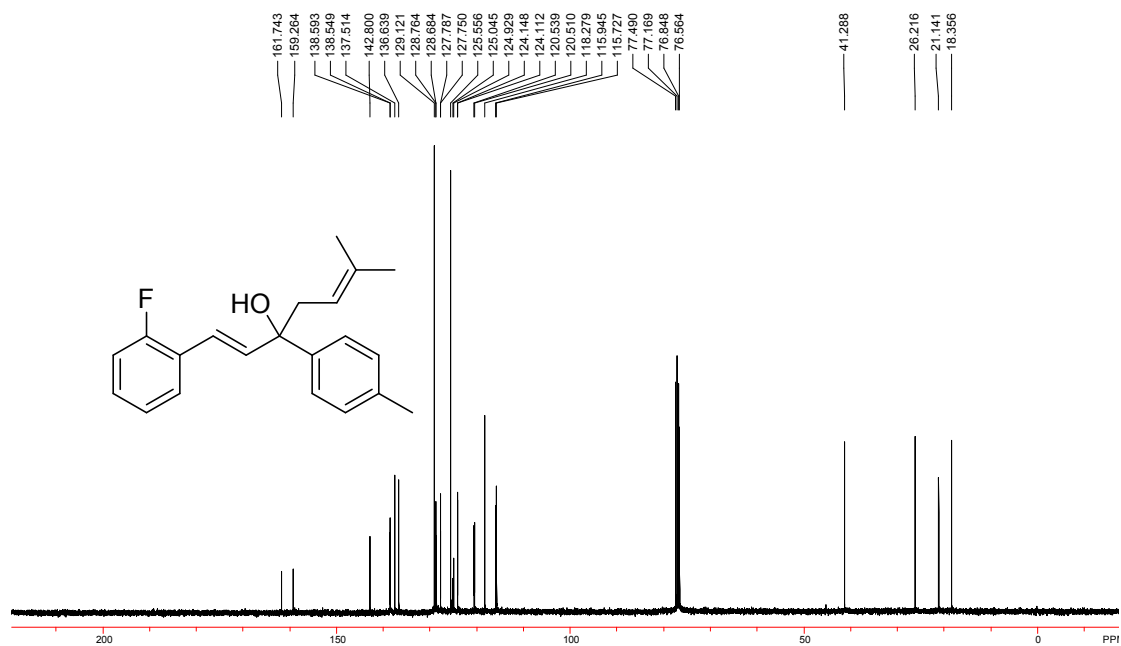

<sup>13</sup>C NMR Spectrum (100 MHz, CDCl<sub>3</sub>) of Compound **2n**

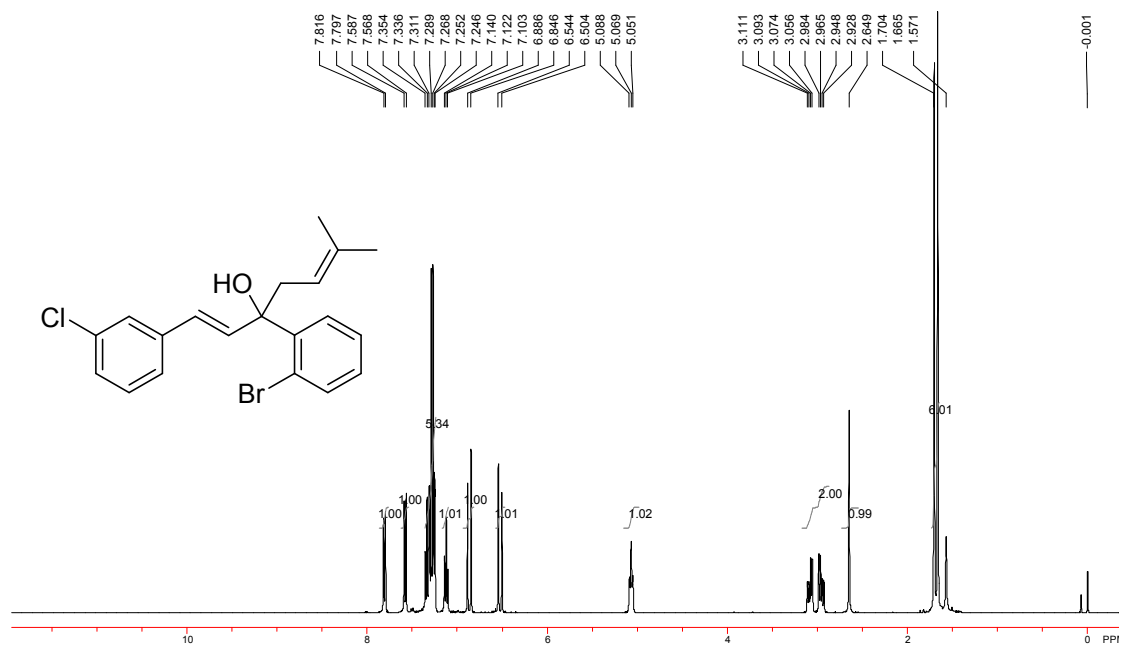

<sup>1</sup>H NMR Spectrum (400 MHz, CDCl<sub>3</sub>) of Compound **2o**

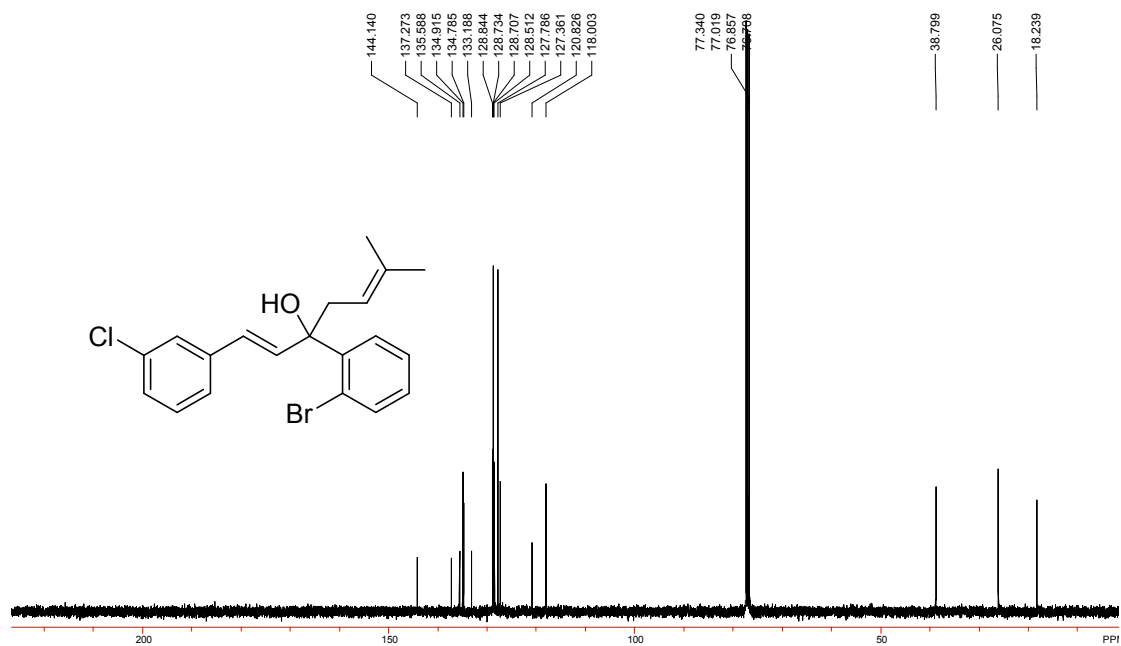

**<sup>13</sup>C NMR Spectrum (100 MHz, CDCl<sub>3</sub>) of Compound 2o**

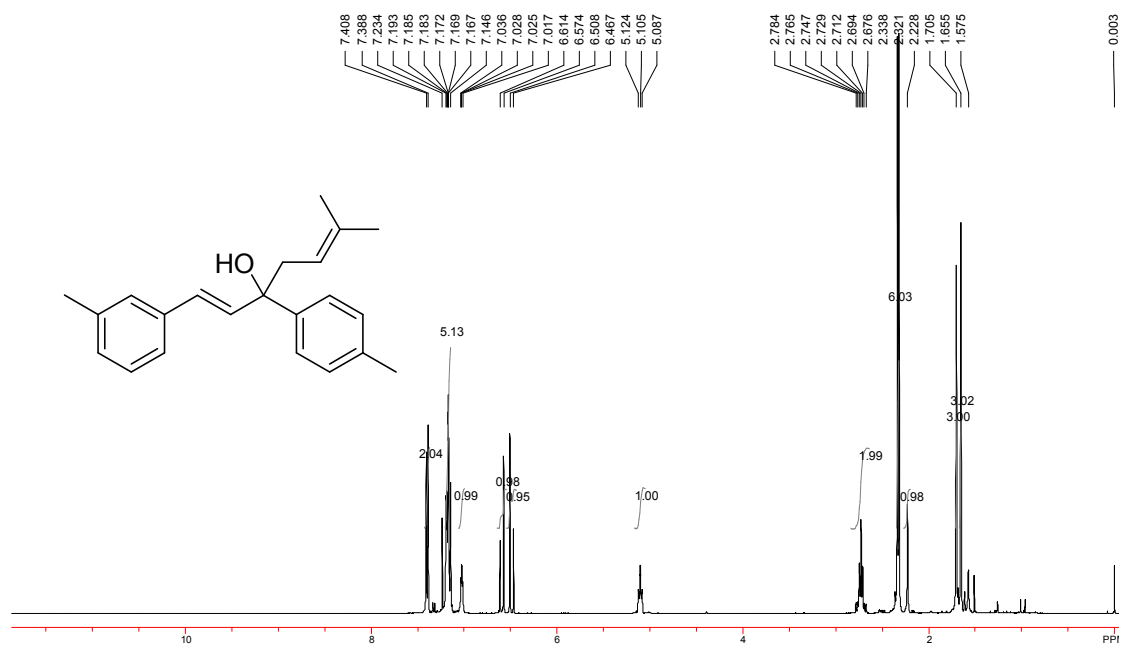

**<sup>1</sup>H NMR Spectrum (400 MHz, CDCl<sub>3</sub>) of Compound 2p**

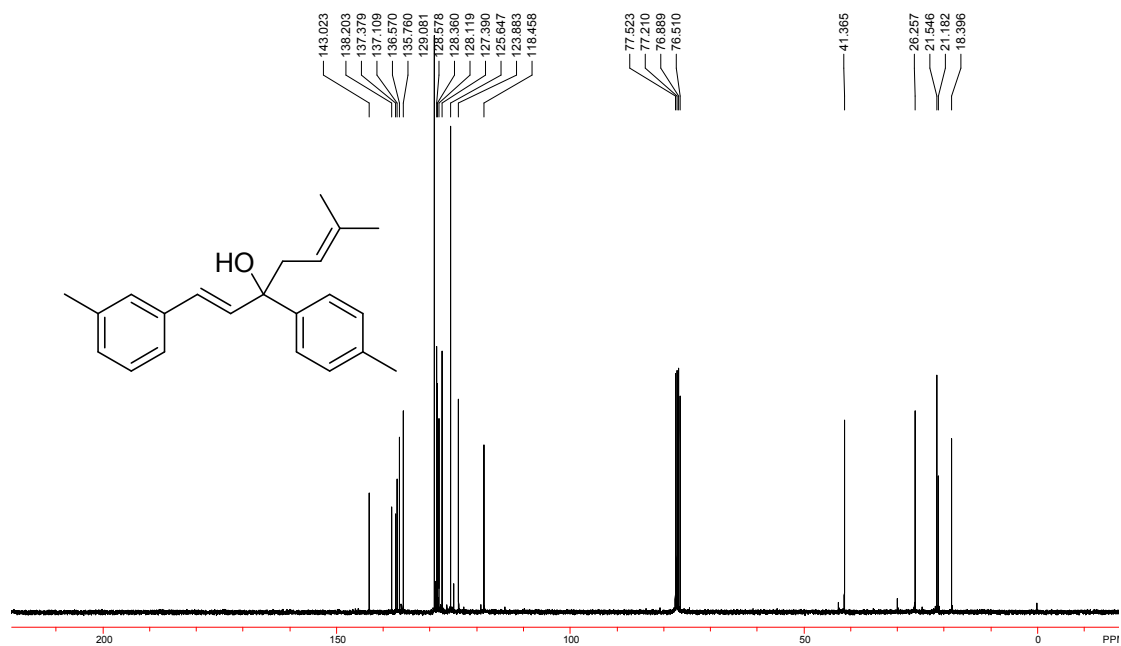

<sup>13</sup>C NMR Spectrum (100 MHz, CDCl<sub>3</sub>) of Compound **2p**

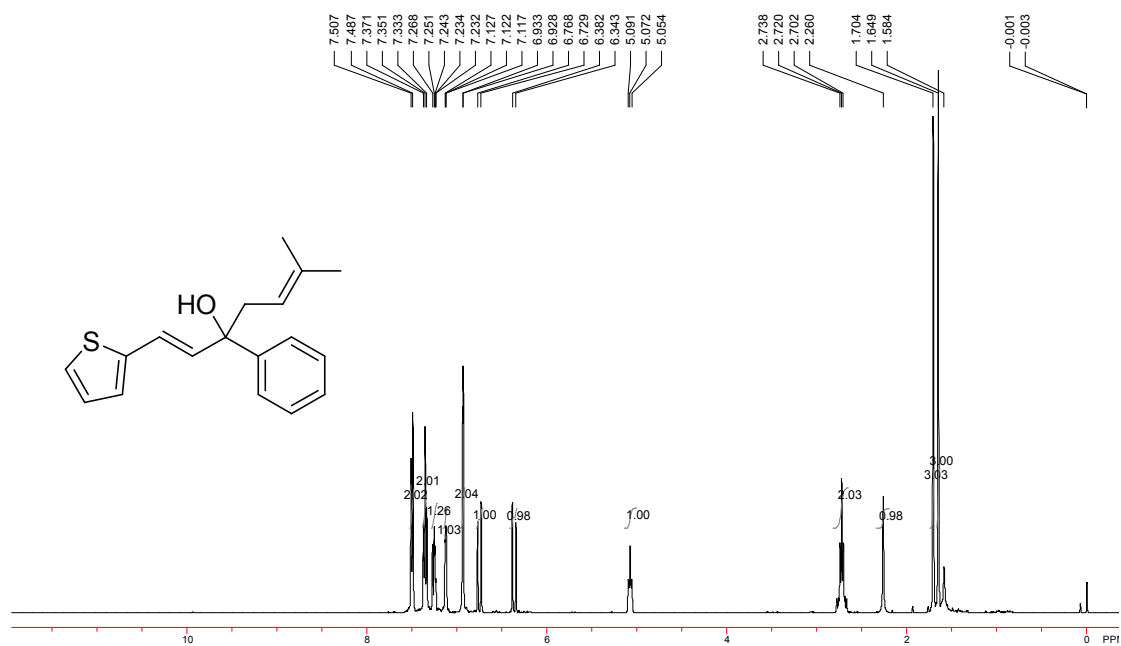

<sup>1</sup>H NMR Spectrum (400 MHz, CDCl<sub>3</sub>) of Compound **2q**

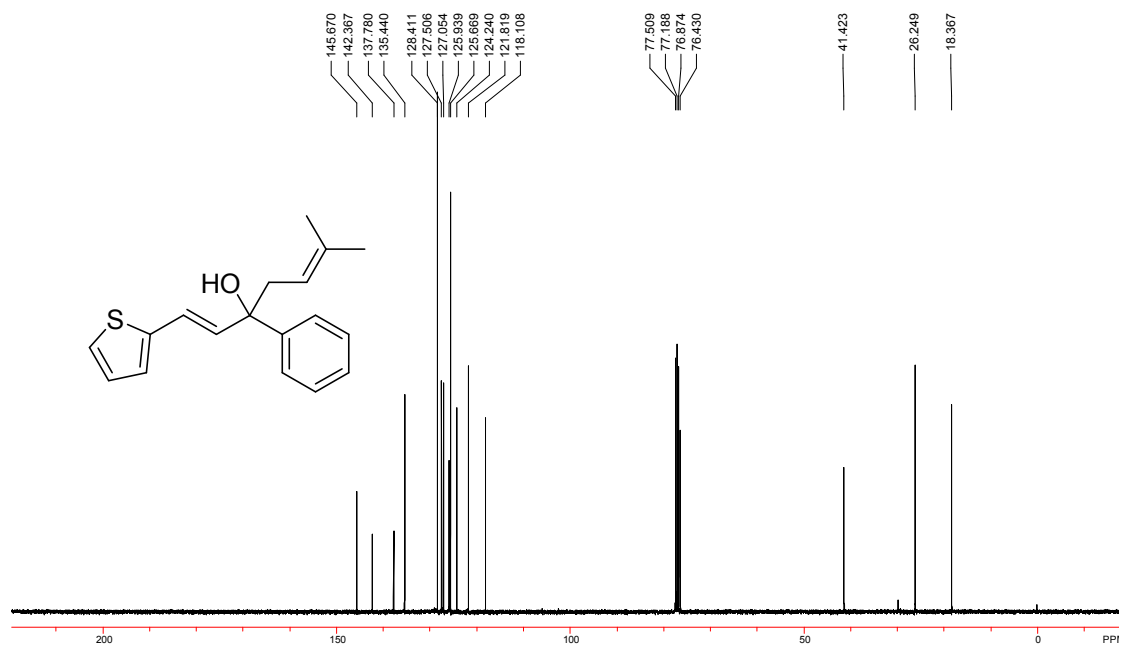

<sup>13</sup>C NMR Spectrum (100 MHz, CDCl<sub>3</sub>) of Compound **2q**

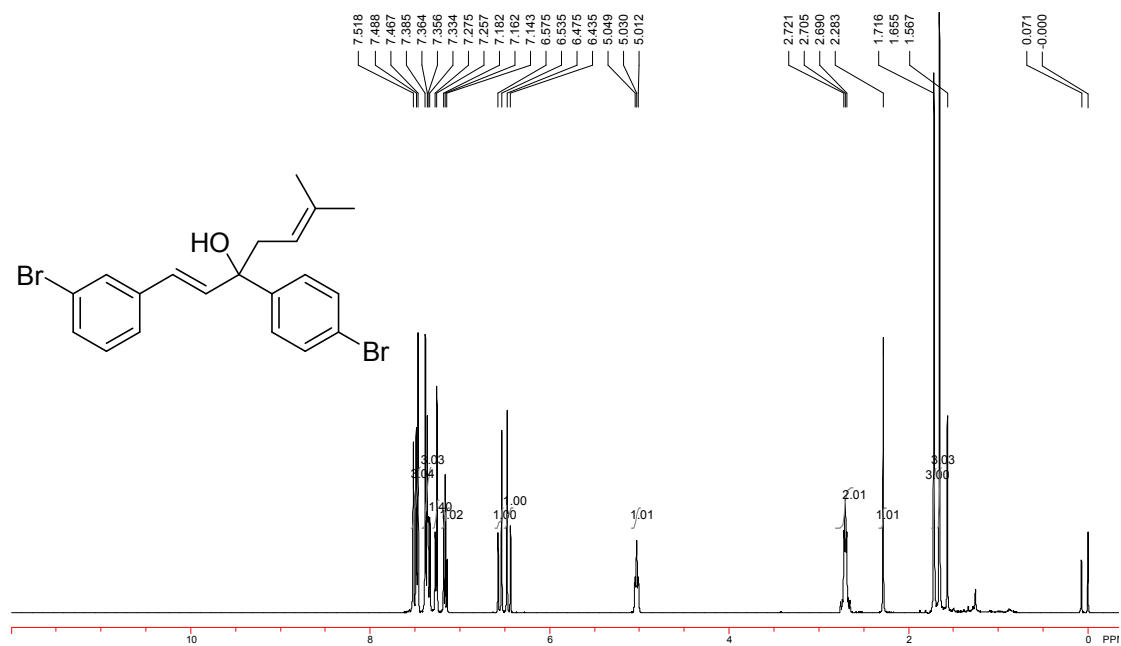

<sup>1</sup>H NMR Spectrum (400 MHz, CDCl<sub>3</sub>) of Compound **2r**



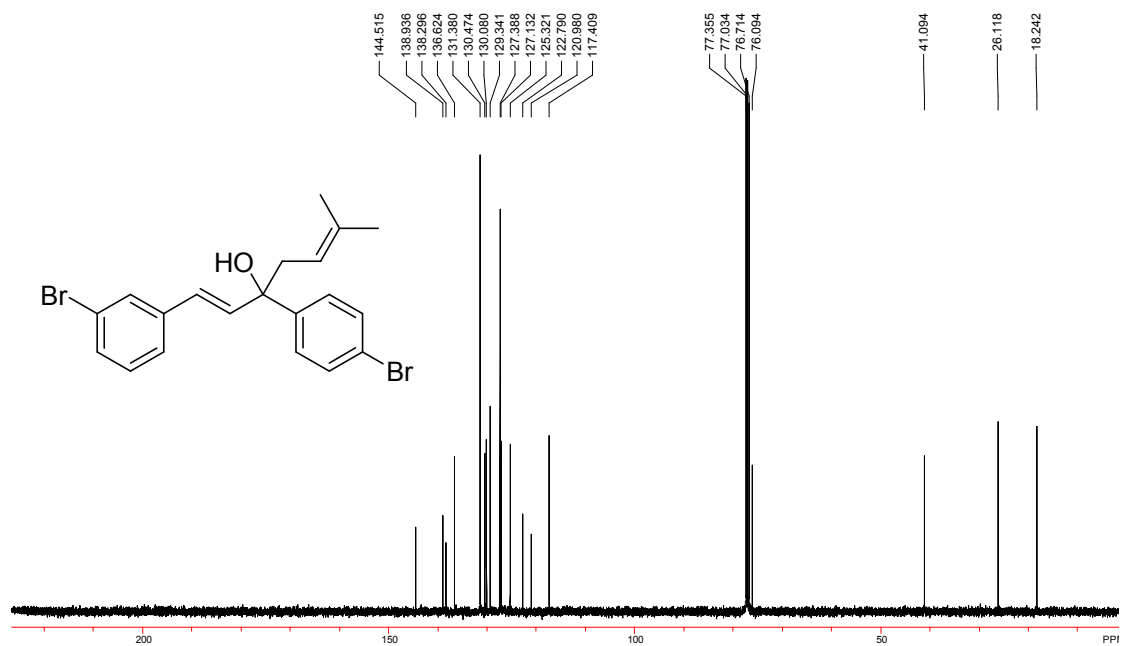

<sup>13</sup>C NMR Spectrum (100 MHz, CDCl<sub>3</sub>) of Compound 2r

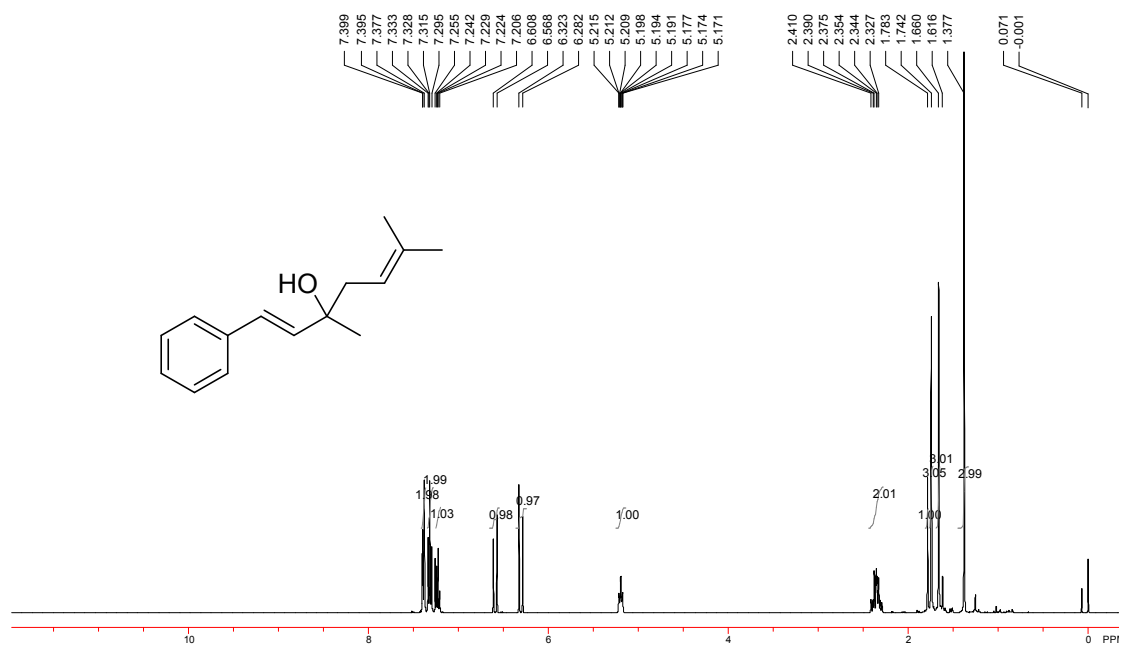

<sup>1</sup>H NMR Spectrum (400 MHz, CDCl<sub>3</sub>) of Compound 2s

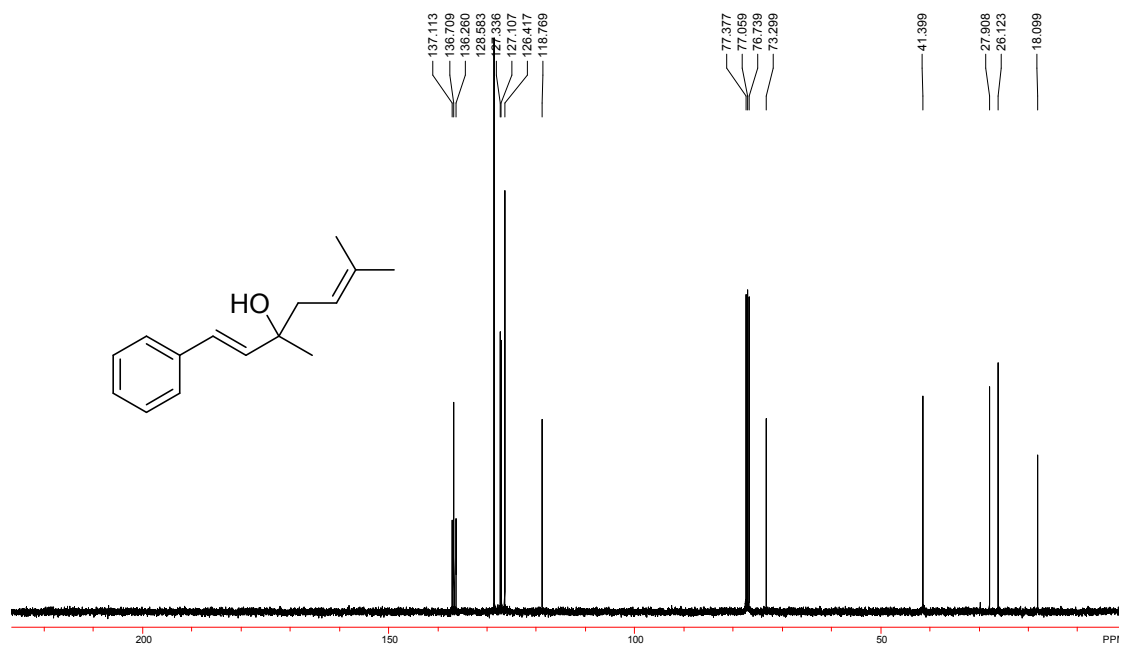

<sup>13</sup>C NMR Spectrum (100 MHz, CDCl<sub>3</sub>) of Compound **2s**

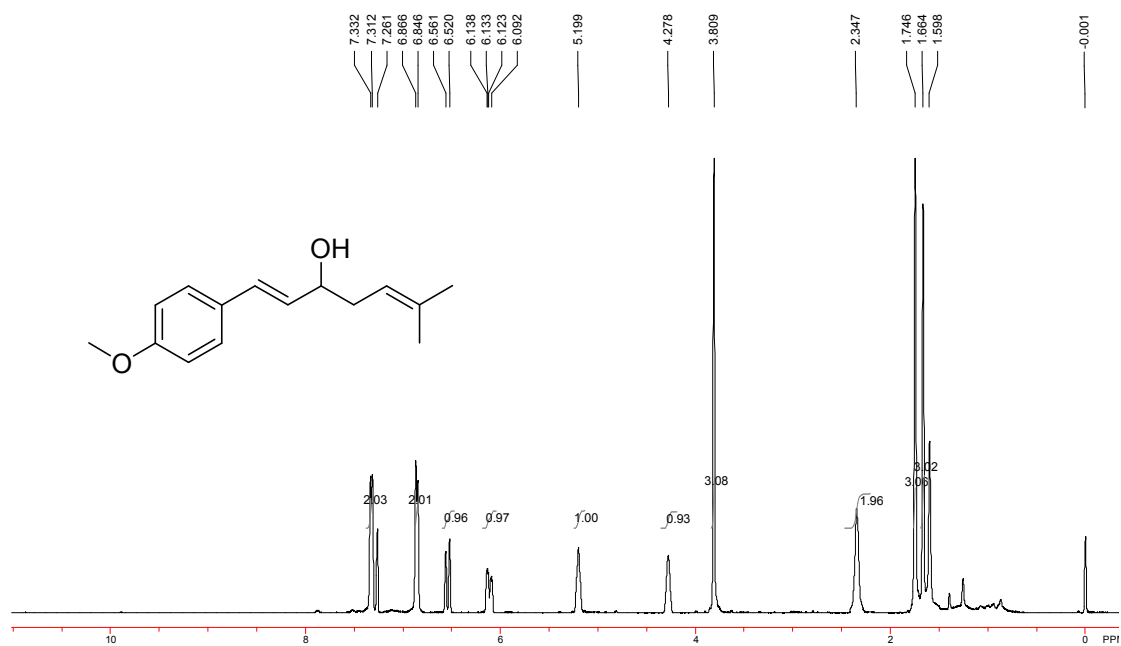

<sup>1</sup>H NMR Spectrum (400 MHz, CDCl<sub>3</sub>) of Compound **2t**

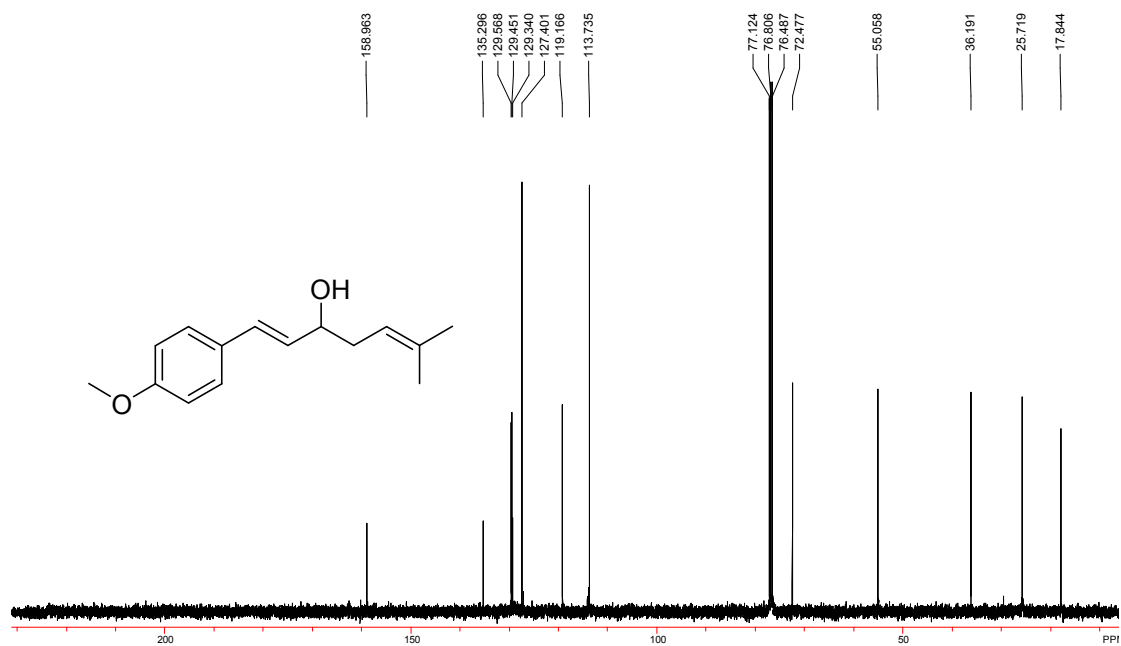

<sup>13</sup>C NMR Spectrum (100 MHz, CDCl<sub>3</sub>) of Compound **2t**

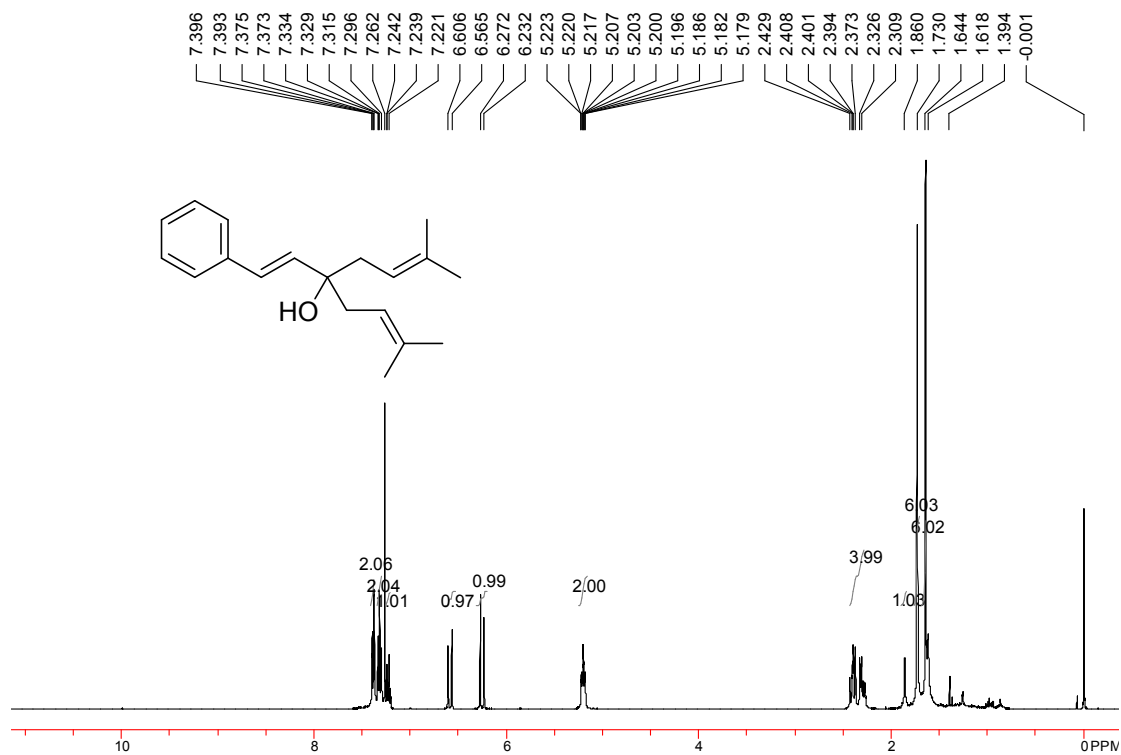

<sup>1</sup>H NMR Spectrum (400 MHz, CDCl<sub>3</sub>) of Compound **2u**

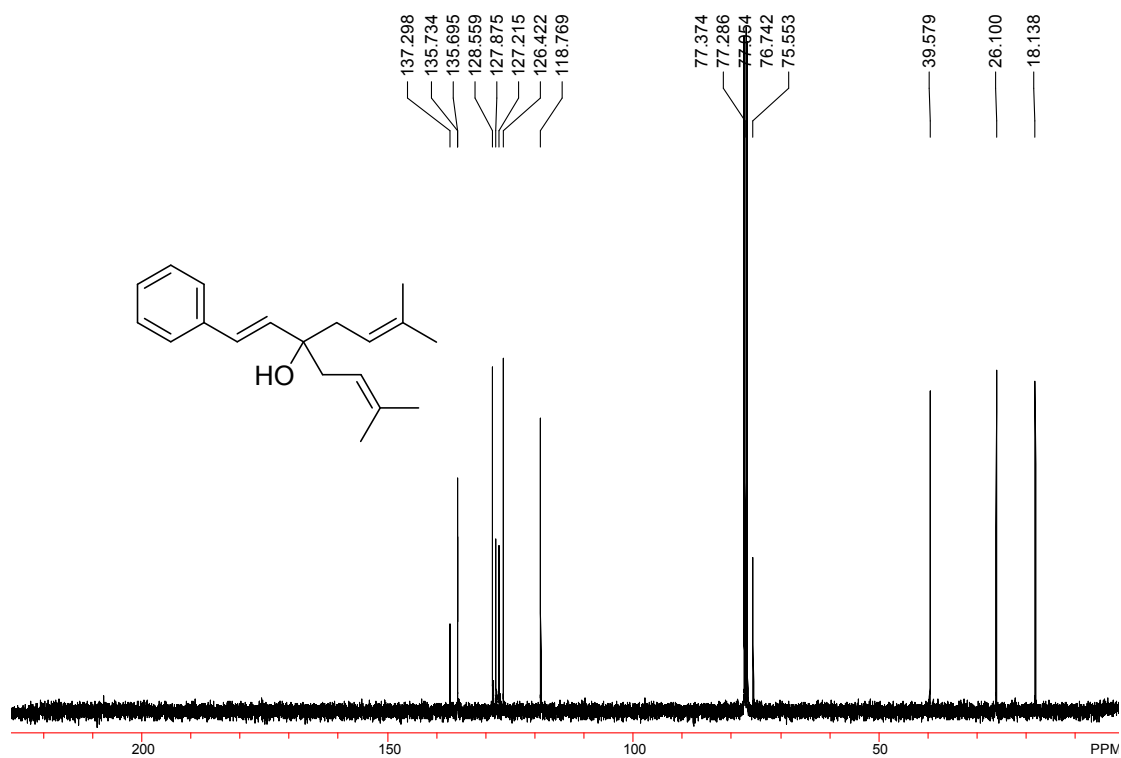

<sup>13</sup>C NMR Spectrum (100 MHz, CDCl<sub>3</sub>) of Compound **2u**

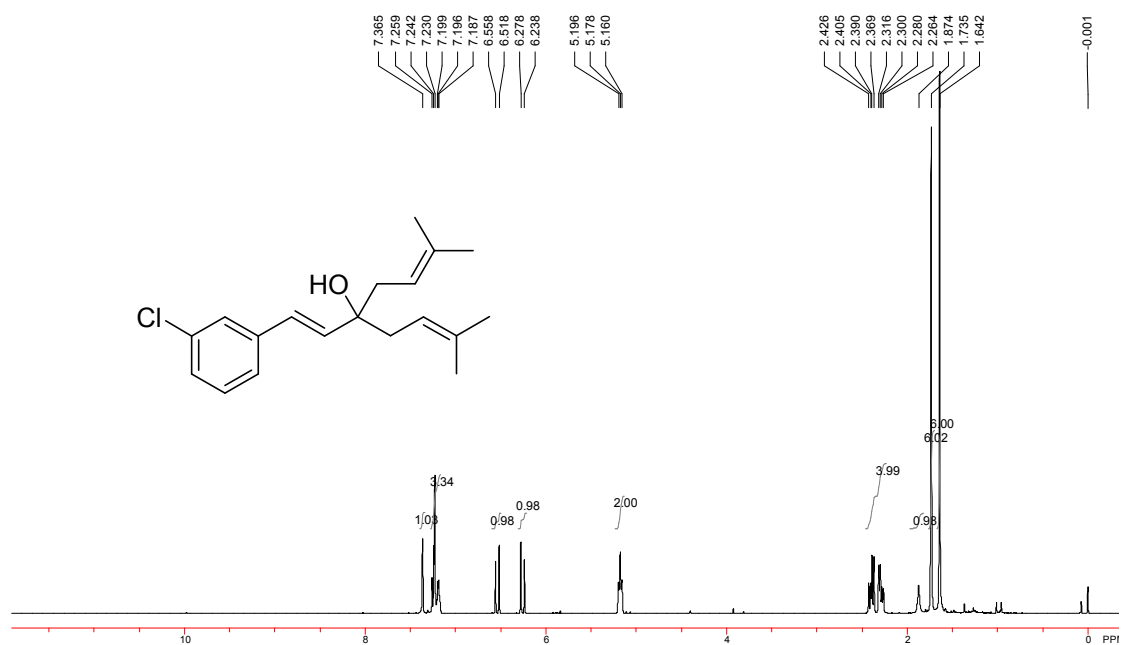

<sup>1</sup>H NMR Spectrum (400 MHz, CDCl<sub>3</sub>) of Compound **2v**

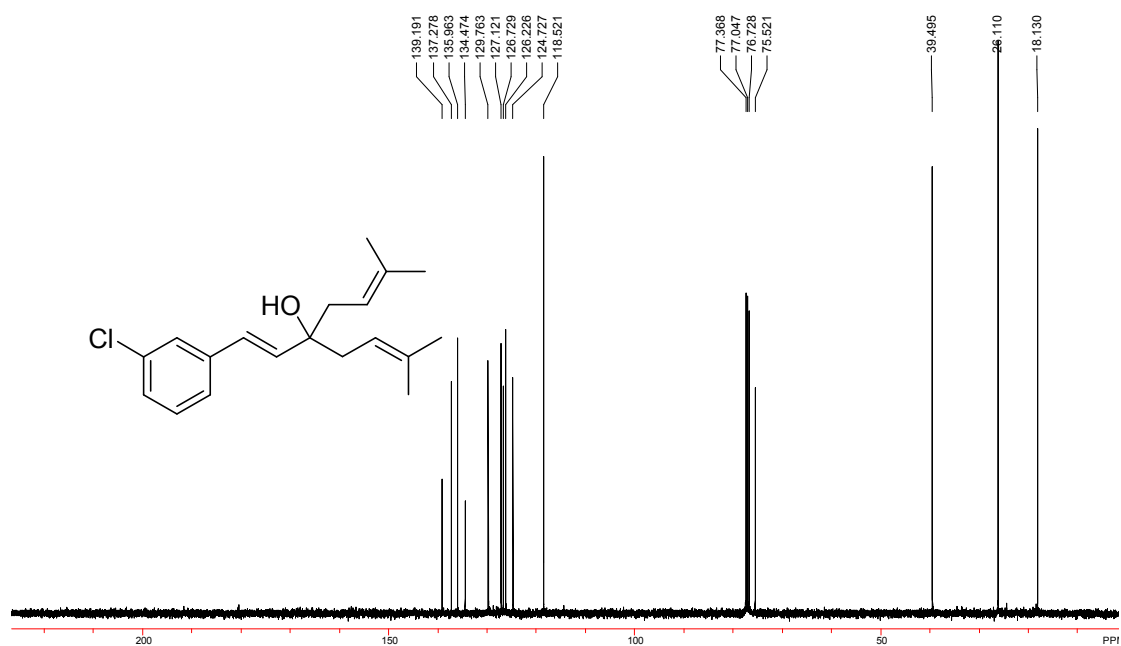

<sup>13</sup>C NMR Spectrum (100 MHz, CDCl<sub>3</sub>) of Compound **2v**

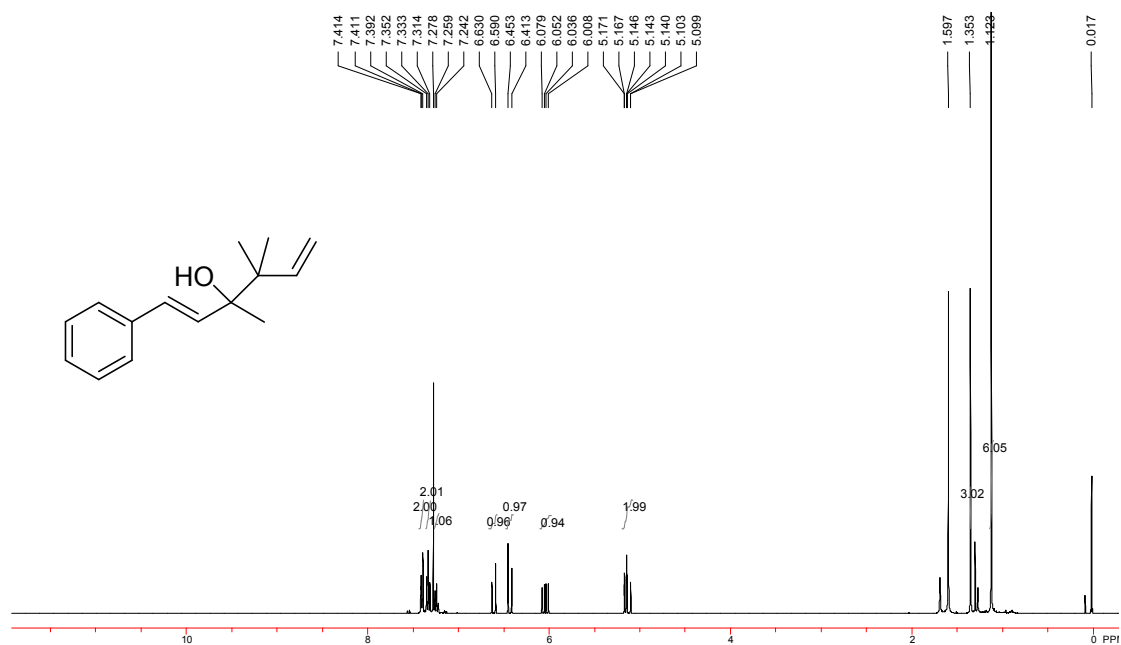

<sup>1</sup>H NMR Spectrum (400 MHz, CDCl<sub>3</sub>) of  $\gamma$ -Adduct from 4-Phenylbut-3-en-2-one **1s**

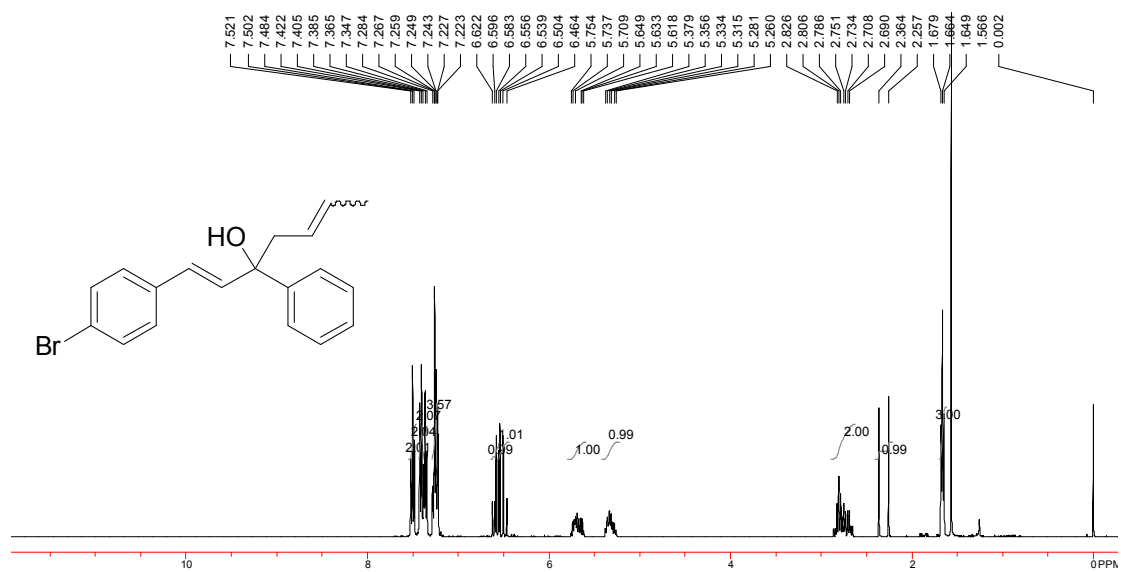

<sup>1</sup>H NMR Spectrum (400 MHz, CDCl<sub>3</sub>) of Compound 3a

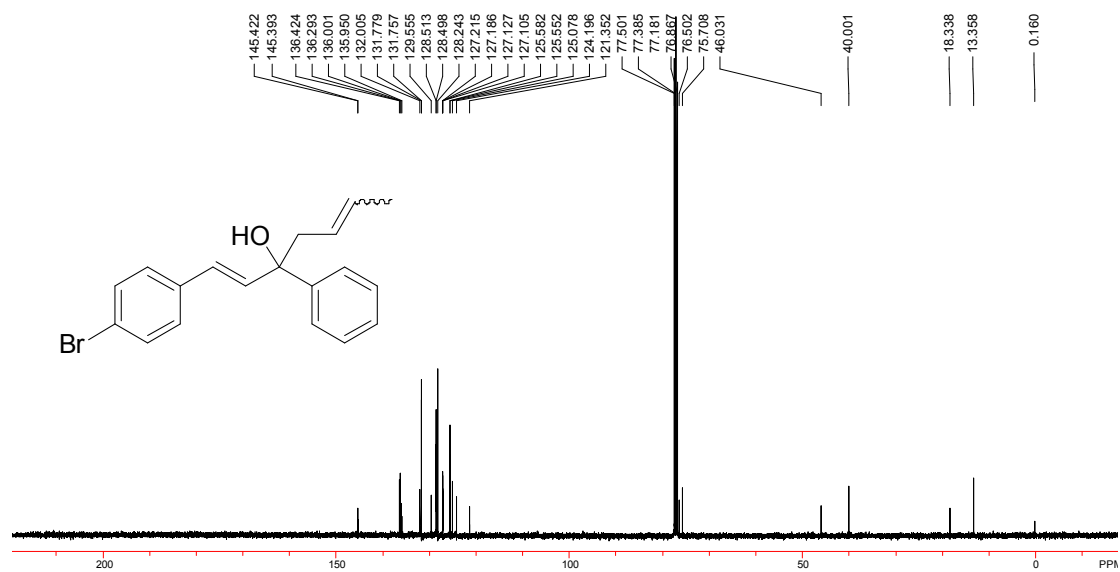

<sup>13</sup>C NMR Spectrum (100 MHz, CDCl<sub>3</sub>) of Compound 3a

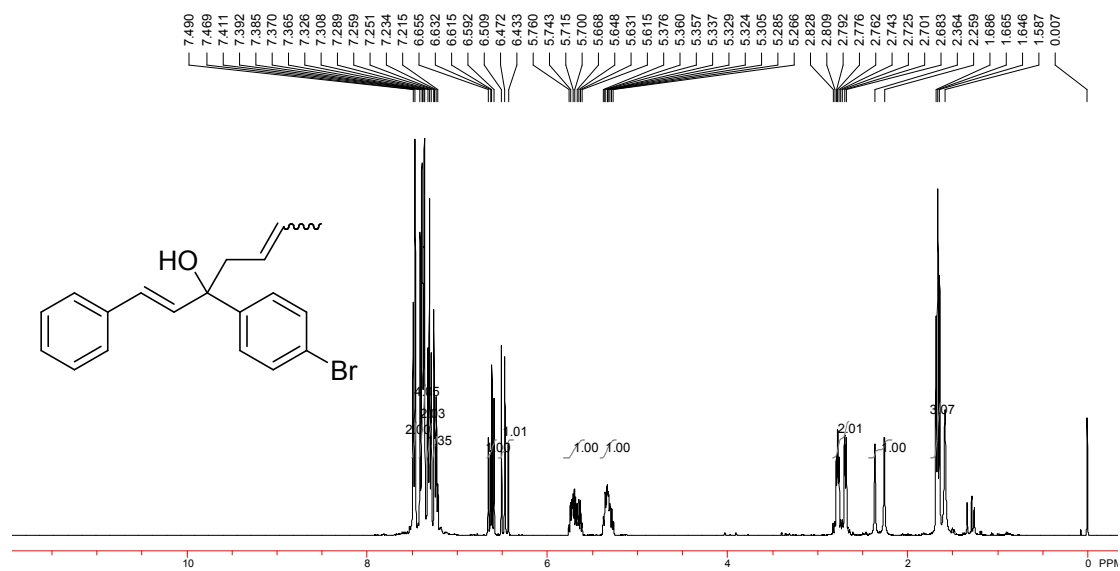

<sup>1</sup>H NMR Spectrum (400 MHz, CDCl<sub>3</sub>) of Compound 3h

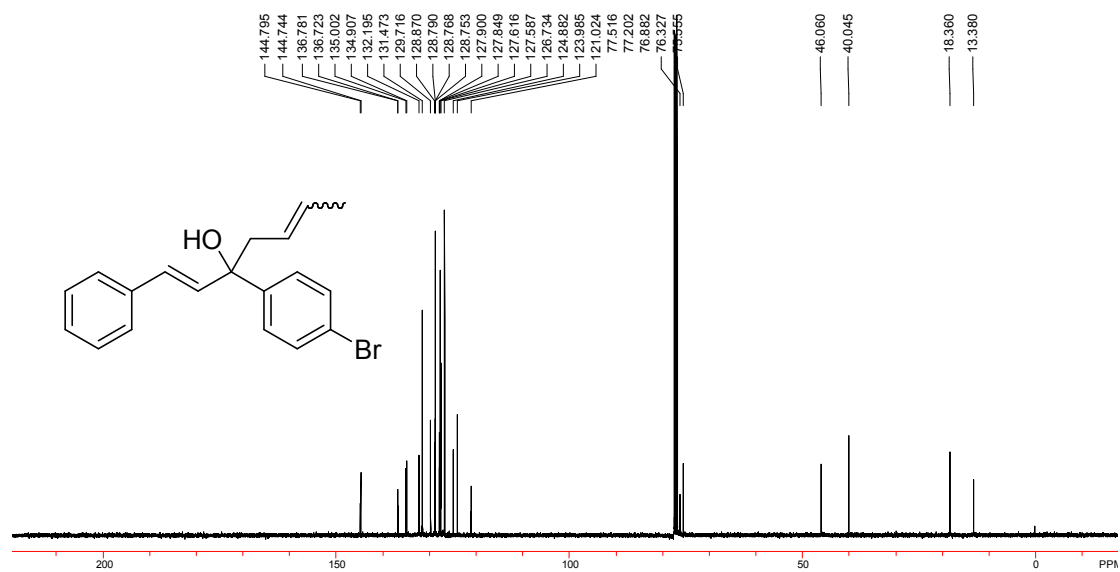

<sup>13</sup>C NMR Spectrum (100 MHz, CDCl<sub>3</sub>) of Compound **3h**

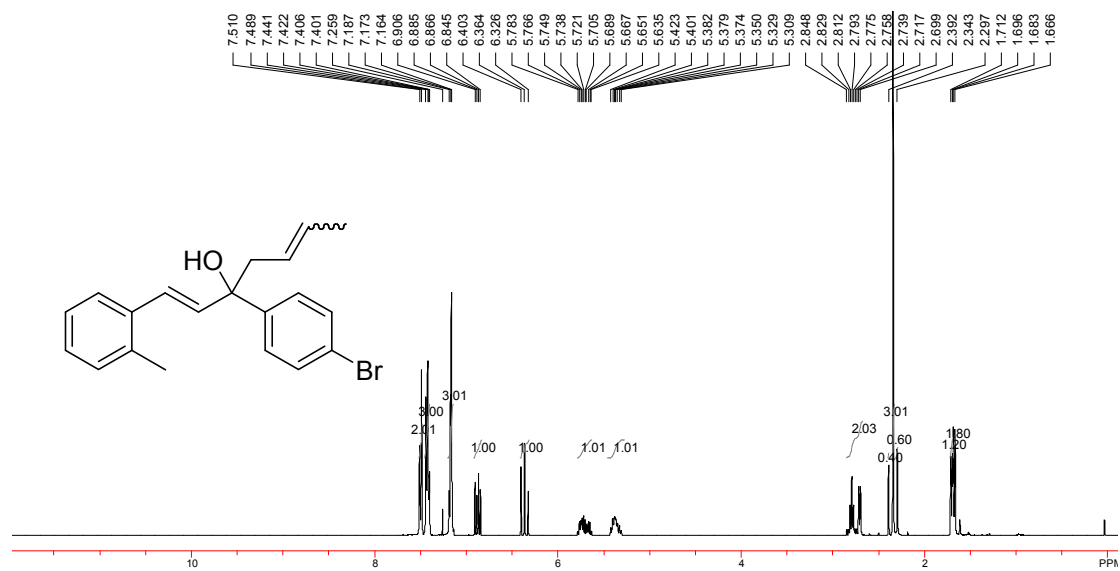

<sup>1</sup>H NMR Spectrum (400 MHz, CDCl<sub>3</sub>) of Compound **3j**



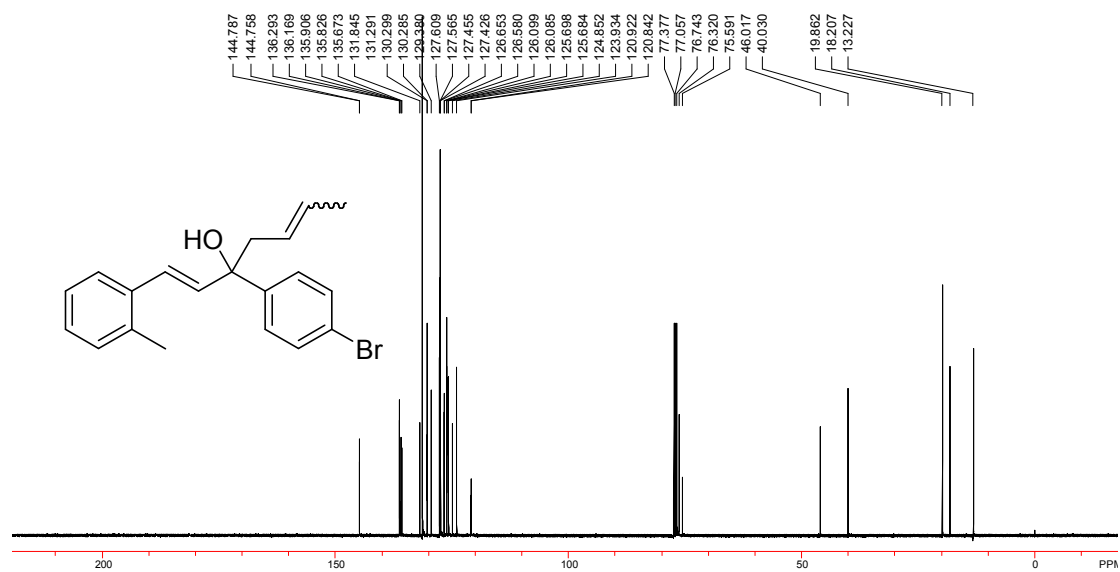

<sup>13</sup>C NMR Spectrum (100 MHz, CDCl<sub>3</sub>) of Compound 3j

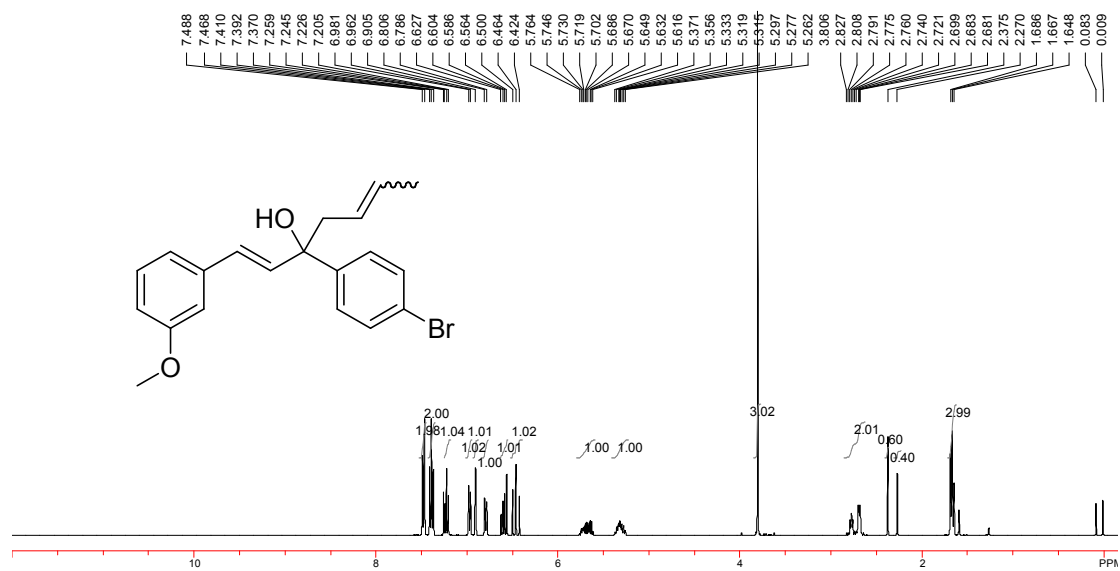

<sup>1</sup>H NMR Spectrum (400 MHz, CDCl<sub>3</sub>) of Compound 3l

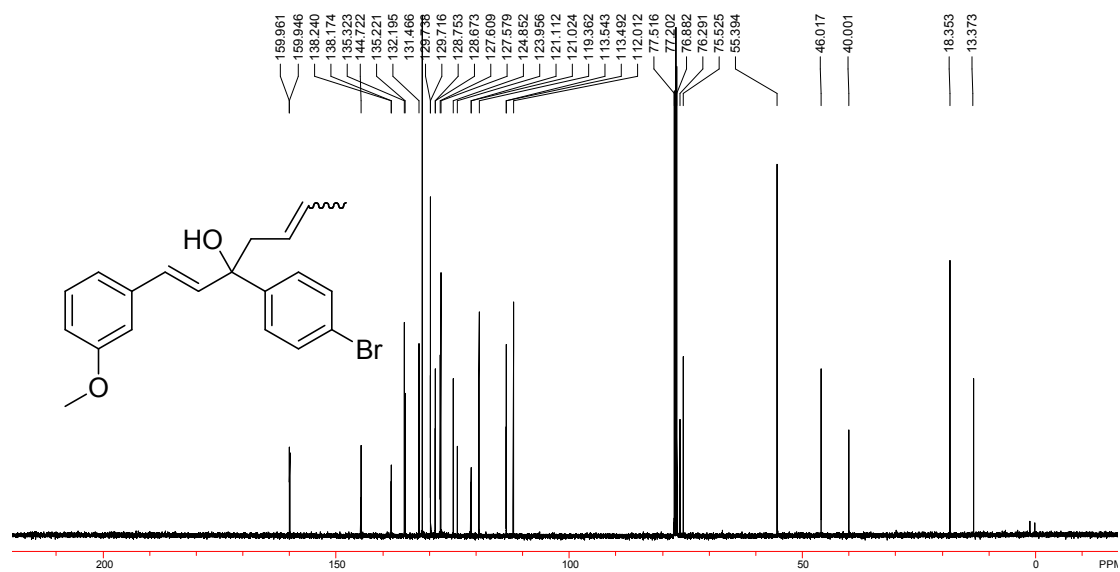

<sup>13</sup>C NMR Spectrum (100 MHz, CDCl<sub>3</sub>) of Compound **3l**

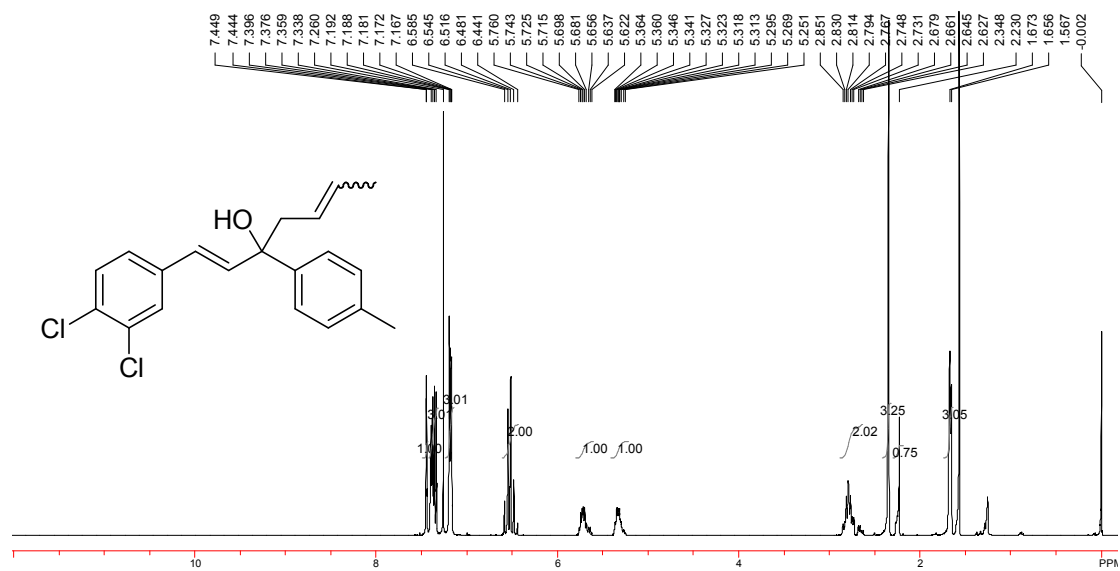

<sup>1</sup>H NMR Spectrum (400 MHz, CDCl<sub>3</sub>) of Compound **3w**

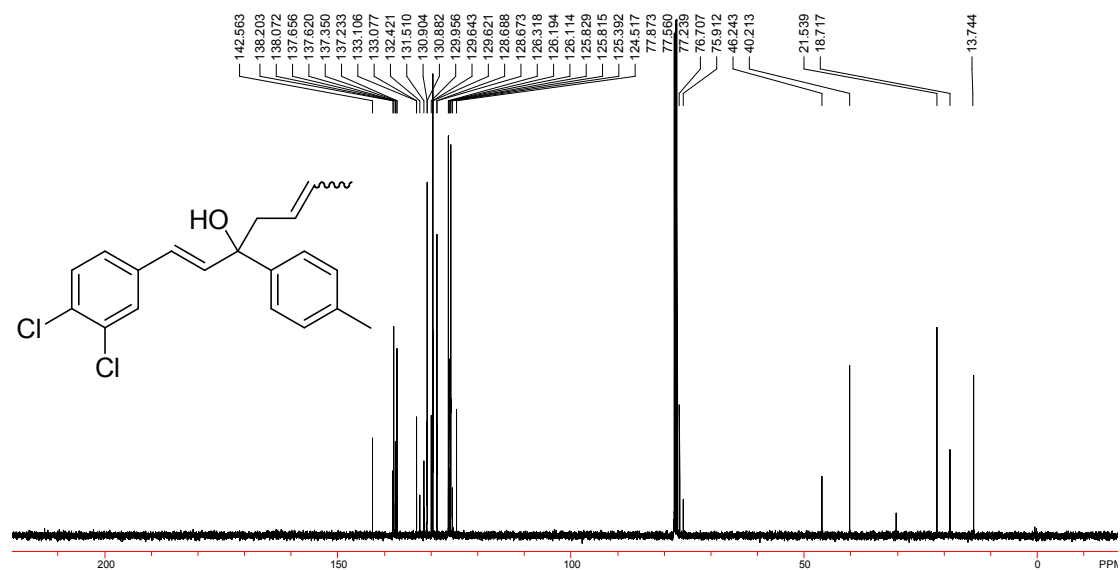

<sup>13</sup>C NMR Spectrum (100 MHz, CDCl<sub>3</sub>) of Compound 3w

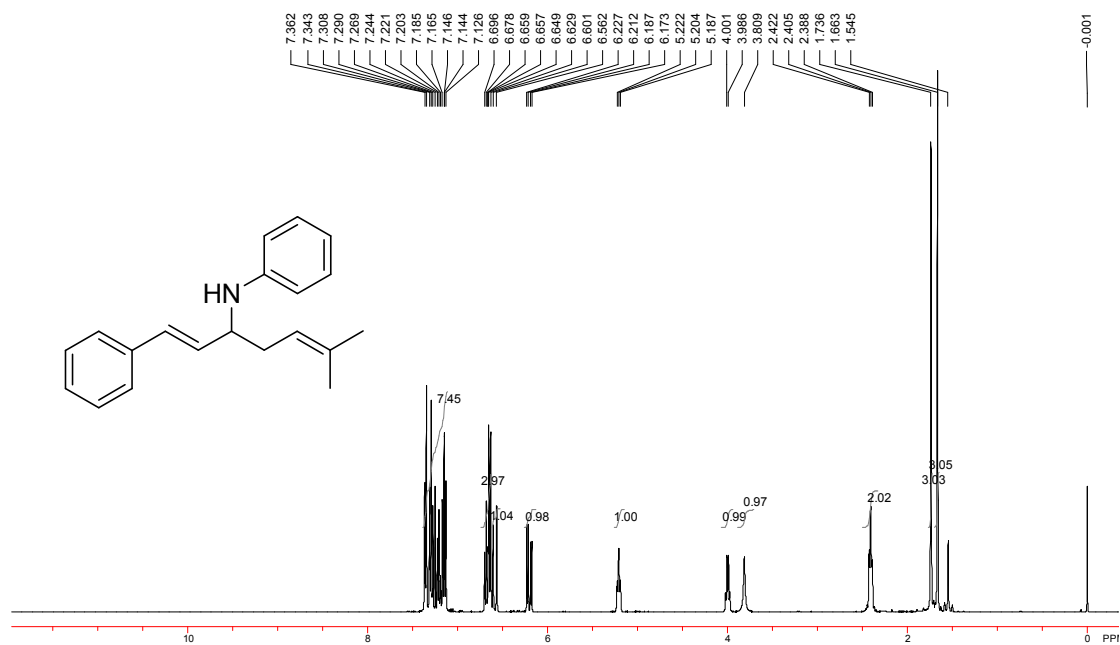

<sup>1</sup>H NMR Spectrum (400 MHz, CDCl<sub>3</sub>) of Compound 4

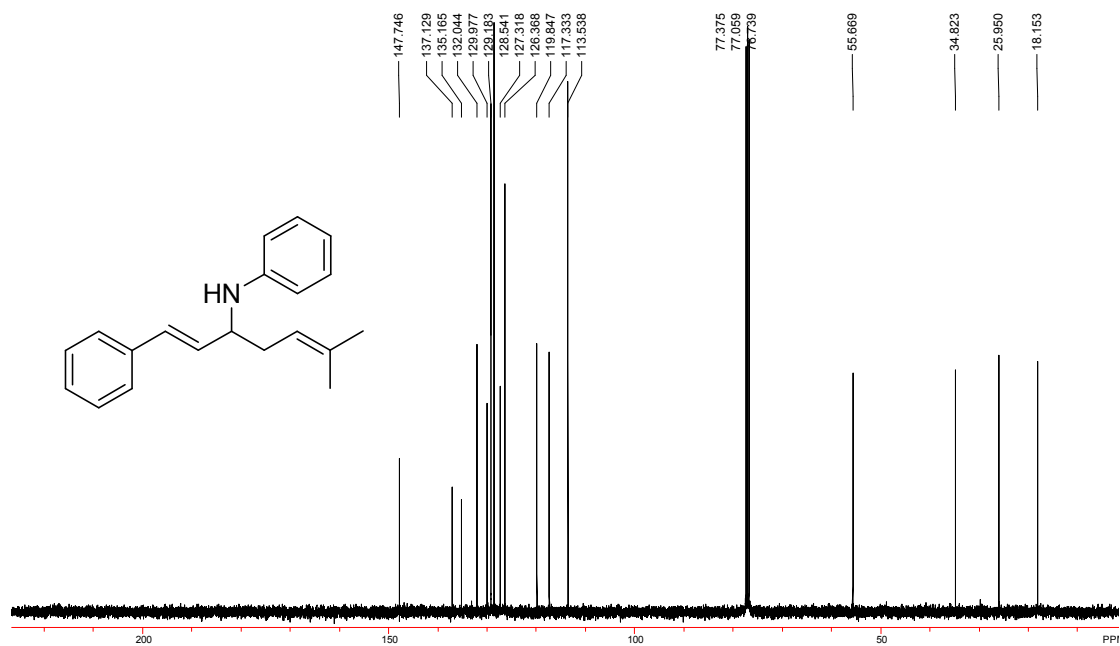

<sup>13</sup>C NMR Spectrum (100 MHz, CDCl<sub>3</sub>) of Compound 4
